# Supplementary material for: Elbasvir Triggers Ferroptosis in Esophageal Squamous Cell Carcinoma Through NCOA4-Mediated Ferritinophagy
Source: Research Square preprint supplement (doi:10.21203/rs.3.rs-7262383/v1), 2025-10-06
Supplement: Supplementary file 1 [file 35389271d2d0819a582c01fd.xlsx]

## Sheet: Sheet1
The differentially expressed proteins (TOP30) that were upregulated after Elbasvir treatment of ESCC cells KYSE150
Accession	Gene_Name	Description	mean_D	mean_E	log2_FC	Pvalue	fdr	D1	D2	D3	E1	E2	E3	Up/Down
Q96GS6	ABHD17A	ABHD17A Alpha/beta hydrolase domain-containing protein 17A OS=Homo sapiens OX=9606 GN=ABHD17A PE=1 SV=1	11.3171	14.4267	3.10965	2.66667e-05	0.00362085	11.4312	11.1813	11.3387	14.277	14.3318	14.6713	Up
Q9NP84	TNFRSF12A	Tumor necrosis factor receptor superfamily member 12A OS=Homo sapiens OX=9606 GN=TNFRSF12A PE=1 SV=1	12.5587	14.5468	1.98806	9.21127e-05	0.00642375	12.4091	12.6143	12.6527	14.3638	14.7076	14.5689	Up
P04114	APOB	Apolipoprotein B-100 OS=Homo sapiens OX=9606 GN=APOB PE=1 SV=2	14.9136	16.7754	1.86183	1.70213e-05	0.00310037	14.8626	14.9533	14.925	16.6858	16.7231	16.9174	Up
Q13772	NCOA4	Nuclear receptor coactivator 4 OS=Homo sapiens OX=9606 GN=NCOA4 PE=1 SV=1	14.3658	16.1444	1.7786	1.02829e-06	0.0012611	14.3712	14.4106	14.3155	16.1863	16.1051	16.1418	Up
Q9NV92	NDFIP2	NEDD4 family-interacting protein 2 OS=Homo sapiens OX=9606 GN=NDFIP2 PE=1 SV=2	13.3545	15.1171	1.76255	2.25335e-05	0.00343429	13.221	13.3857	13.4569	15.0487	15.1571	15.1454	Up
P13501	CCL5	C-C motif chemokine 5 OS=Homo sapiens OX=9606 GN=CCL5 PE=1 SV=3	10.3707	11.9748	1.6041	1.89102e-05	0.00320958	10.3736	10.3687	10.3698	12.0306	11.8399	12.0539	Up
Q13501	SQSTM1	Sequestosome-1 OS=Homo sapiens OX=9606 GN=SQSTM1 PE=1 SV=1	14.6499	16.2274	1.57742	0.000420312	0.0123094	14.3855	14.7426	14.8217	16.1123	16.267	16.3027	Up
Q8NC26	ZNF114	Zinc finger protein 114 OS=Homo sapiens OX=9606 GN=ZNF114 PE=1 SV=1	14	15.5651	1.56503	5.06341e-05	0.00512395	14.1523	13.9048	13.943	15.4986	15.6203	15.5763	Up
Q14596	NBR1	Next to BRCA1 gene 1 protein OS=Homo sapiens OX=9606 GN=NBR1 PE=1 SV=3	12.7914	14.3237	1.5323	1.83925e-06	0.00137355	12.8118	12.7247	12.8377	14.3466	14.3152	14.3093	Up
Q86VP1	TAX1BP1	Tax1-binding protein 1 OS=Homo sapiens OX=9606 GN=TAX1BP1 PE=1 SV=2	16.8371	18.3534	1.51627	6.46103e-07	0.00115635	16.7934	16.8578	16.8602	18.3731	18.3668	18.3203	Up
P41273	TNFSF9	Tumor necrosis factor ligand superfamily member 9 OS=Homo sapiens OX=9606 GN=TNFSF9 PE=1 SV=1	12.2862	13.7738	1.48763	0.000317647	0.011085	12.0656	12.4159	12.3772	13.8302	13.8469	13.6445	Up
Q96CS7	PLEKHB2	Pleckstrin homology domain-containing family B member 2 OS=Homo sapiens OX=9606 GN=PLEKHB2 PE=1 SV=1	12.7729	14.257	1.48415	4.90441e-06	0.00192769	12.7031	12.7916	12.824	14.2392	14.2231	14.3088	Up
Q14512	FGFBP1	Fibroblast growth factor-binding protein 1 OS=Homo sapiens OX=9606 GN=FGFBP1 PE=1 SV=1	12.8639	14.331	1.46707	5.16673e-05	0.00512395	12.714	12.9105	12.9672	14.3655	14.2897	14.3377	Up
P01583	IL1A	Interleukin-1 alpha OS=Homo sapiens OX=9606 GN=IL1A PE=1 SV=1	12.5637	13.9828	1.41911	0.000251641	0.010367	12.6592	12.3946	12.6372	13.85	14.1213	13.977	Up
P15514	AREG	Amphiregulin OS=Homo sapiens OX=9606 GN=AREG PE=1 SV=2	9.87841	11.2915	1.41311	2.03162e-05	0.00329829	9.95944	9.7786	9.89718	11.3238	11.2321	11.3186	Up
P05120	SERPINB2	Plasminogen activator inhibitor 2 OS=Homo sapiens OX=9606 GN=SERPINB2 PE=1 SV=2	11.3303	12.7232	1.39284	0.000451711	0.0126819	11.2466	11.2279	11.5165	12.6991	12.5756	12.8949	Up
Q9BT67	NDFIP1	NEDD4 family-interacting protein 1 OS=Homo sapiens OX=9606 GN=NDFIP1 PE=1 SV=1	12.2839	13.6755	1.39153	1.62982e-05	0.00304288	12.2381	12.3698	12.2439	13.6295	13.6484	13.7485	Up
Q96QD8	SLC38A2	Sodium-coupled neutral amino acid symporter 2 OS=Homo sapiens OX=9606 GN=SLC38A2 PE=1 SV=2	15.3924	16.7839	1.39153	4.17527e-07	0.00115635	15.3862	15.3646	15.4263	16.7825	16.8081	16.7611	Up
O75509	TNFRSF21	Tumor necrosis factor receptor superfamily member 21 OS=Homo sapiens OX=9606 GN=TNFRSF21 PE=1 SV=1	10.7183	12.0885	1.37018	5.96623e-05	0.00542158	10.6026	10.8414	10.7109	12.0191	12.1301	12.1163	Up
Q9NY26	SLC39A1	Zinc transporter ZIP1 OS=Homo sapiens OX=9606 GN=SLC39A1 PE=1 SV=1	11.5576	12.9207	1.36302	0.000111914	0.00714339	11.5131	11.4813	11.6785	12.8492	13.0533	12.8595	Up
P58335	ANTXR2	Anthrax toxin receptor 2 OS=Homo sapiens OX=9606 GN=ANTXR2 PE=1 SV=5	11.918	13.2763	1.35829	3.31918e-05	0.00413367	11.9338	11.9664	11.8538	13.2312	13.2081	13.3896	Up
P55082	MFAP3	Microfibril-associated glycoprotein 3 OS=Homo sapiens OX=9606 GN=MFAP3 PE=1 SV=1	11.9466	13.2963	1.34964	2.42057e-05	0.00351387	11.9143	12.0055	11.9202	13.3086	13.1989	13.3814	Up
Q969W9	PMEPA1	Protein TMEPAI OS=Homo sapiens OX=9606 GN=PMEPA1 PE=1 SV=1	9.78385	11.1282	1.34439	9.49495e-05	0.00642375	9.87297	9.6717	9.8069	11.1514	11.0121	11.2212	Up
P15260	IFNGR1	Interferon gamma receptor 1 OS=Homo sapiens OX=9606 GN=IFNGR1 PE=1 SV=1	12.7315	14.054	1.32248	0.000134759	0.00756679	12.6457	12.9048	12.6442	14.113	14.0123	14.0367	Up
Q96M89	CCDC138	Coiled-coil domain-containing protein 138 OS=Homo sapiens OX=9606 GN=CCDC138 PE=1 SV=1	12.9501	14.252	1.30188	0.000138198	0.00764492	12.8477	12.9897	13.013	14.1558	14.2009	14.3994	Up
P02655	APOC2	Apolipoprotein C-II OS=Homo sapiens OX=9606 GN=APOC2 PE=1 SV=1	10.9361	12.2326	1.29645	0.000341657	0.0114932	11.0638	10.7802	10.9644	12.3241	12.2967	12.0771	Up
Q9NU53	GINM1	Glycoprotein integral membrane protein 1 OS=Homo sapiens OX=9606 GN=GINM1 PE=1 SV=1	12.7542	14.0364	1.28226	5.11658e-05	0.00512395	12.6256	12.8237	12.8132	14.0354	13.991	14.083	Up
P02794	FTH1	Ferritin heavy chain OS=Homo sapiens OX=9606 GN=FTH1 PE=1 SV=2	13.9679	15.247	1.27911	0.000113461	0.00718073	14.0054	13.9649	13.9333	15.4117	15.1647	15.1645	Up
P25116	F2R	Proteinase-activated receptor 1 OS=Homo sapiens OX=9606 GN=F2R PE=1 SV=2	11.3803	12.6341	1.25382	0.000848244	0.0178442	11.167	11.3374	11.6366	12.5845	12.665	12.6529	Up
O60637	TSPAN3	Tetraspanin-3 OS=Homo sapiens OX=9606 GN=TSPAN3 PE=2 SV=1	14.2833	15.5218	1.23857	7.15102e-07	0.00115635	14.3141	14.2492	14.2864	15.5208	15.4993	15.5454	Up
