# Supplementary material for: Elbasvir Triggers Ferroptosis in Esophageal Squamous Cell Carcinoma Through NCOA4-Mediated Ferritinophagy
Source: Research Square preprint supplement (doi:10.21203/rs.3.rs-7262383/v1), 2025-10-06
Supplement: Supplementary file 2 [file a4cf02dd873564c79932cc8a.xlsx]

## Sheet: Sheet1
The differentially expressed proteins after Elbasvir treatment of KYSE150 cells
Accession	Gene_Name	Description	mean_D	mean_E	log2_FC	Pvalue	fdr	D1	D2	D3	E1	E2	E3	Up/Down
Q96QD8	SLC38A2	Sodium-coupled neutral amino acid symporter 2 OS=Homo sapiens OX=9606 GN=SLC38A2 PE=1 SV=2	15.3924	16.7839	1.39153	4.17527e-07	0.00115635	15.3862	15.3646	15.4263	16.7825	16.8081	16.7611	Up
Q9NRX5	SERINC1	Serine incorporator 1 OS=Homo sapiens OX=9606 GN=SERINC1 PE=1 SV=1	14.7996	15.9748	1.17521	4.82782e-07	0.00115635	14.8138	14.8042	14.7809	16.0081	15.9503	15.9661	Up
Q86VP1	TAX1BP1	Tax1-binding protein 1 OS=Homo sapiens OX=9606 GN=TAX1BP1 PE=1 SV=2	16.8371	18.3534	1.51627	6.46103e-07	0.00115635	16.7934	16.8578	16.8602	18.3731	18.3668	18.3203	Up
O60637	TSPAN3	Tetraspanin-3 OS=Homo sapiens OX=9606 GN=TSPAN3 PE=2 SV=1	14.2833	15.5218	1.23857	7.15102e-07	0.00115635	14.3141	14.2492	14.2864	15.5208	15.4993	15.5454	Up
Q6XZF7	DNMBP	Dynamin-binding protein OS=Homo sapiens OX=9606 GN=DNMBP PE=1 SV=1	15.7877	16.2605	0.472849	7.74201e-07	0.00115635	15.7961	15.7838	15.7831	16.2478	16.2588	16.275	Up
Q13772	NCOA4	Nuclear receptor coactivator 4 OS=Homo sapiens OX=9606 GN=NCOA4 PE=1 SV=1	14.3658	16.1444	1.7786	1.02829e-06	0.0012611	14.3712	14.4106	14.3155	16.1863	16.1051	16.1418	Up
Q8IY22	CMIP	C-Maf-inducing protein OS=Homo sapiens OX=9606 GN=CMIP PE=1 SV=3	14.4777	14.9895	0.5118	1.18207e-06	0.0012611	14.4731	14.4847	14.4754	14.9853	14.9744	15.0089	Up
Q15025	TNIP1	TNFAIP3-interacting protein 1 OS=Homo sapiens OX=9606 GN=TNIP1 PE=1 SV=2	15.0663	15.678	0.611757	1.53427e-06	0.00133604	15.0767	15.051	15.0711	15.6561	15.6838	15.6942	Up
P08962	CD63	CD63 antigen OS=Homo sapiens OX=9606 GN=CD63 PE=1 SV=2	14.3724	15.5108	1.13842	1.61012e-06	0.00133604	14.347	14.3855	14.3845	15.5135	15.4703	15.5485	Up
Q14596	NBR1	Next to BRCA1 gene 1 protein OS=Homo sapiens OX=9606 GN=NBR1 PE=1 SV=3	12.7914	14.3237	1.5323	1.83925e-06	0.00137355	12.8118	12.7247	12.8377	14.3466	14.3152	14.3093	Up
P10321	HLA-C	HLA class I histocompatibility antigen, C alpha chain OS=Homo sapiens OX=9606 GN=HLA-C PE=1 SV=3	16.6082	16.9219	0.313739	2.35382e-06	0.00154843	16.6041	16.6128	16.6077	16.9367	16.9133	16.9158	Up
P35367	HRH1	Histamine H1 receptor OS=Homo sapiens OX=9606 GN=HRH1 PE=1 SV=1	12.493	13.477	0.984033	2.57685e-06	0.00154843	12.525	12.5105	12.4434	13.4751	13.4811	13.4749	Up
P01130	LDLR	Low-density lipoprotein receptor OS=Homo sapiens OX=9606 GN=LDLR PE=1 SV=1	16.1114	16.9186	0.807183	2.69545e-06	0.00154843	16.1003	16.0857	16.1482	16.9035	16.9346	16.9176	Up
Q13137	CALCOCO2	Calcium-binding and coiled-coil domain-containing protein 2 OS=Homo sapiens OX=9606 GN=CALCOCO2 PE=1 SV=1	15.5755	16.5616	0.986107	3.36456e-06	0.00159532	15.5284	15.6084	15.5896	16.5654	16.5389	16.5805	Up
P29317	EPHA2	Ephrin type-A receptor 2 OS=Homo sapiens OX=9606 GN=EPHA2 PE=1 SV=2	16.2791	16.9227	0.643657	4.12536e-06	0.00181225	16.2461	16.2978	16.2933	16.9358	16.9069	16.9255	Up
Q96CS7	PLEKHB2	Pleckstrin homology domain-containing family B member 2 OS=Homo sapiens OX=9606 GN=PLEKHB2 PE=1 SV=1	12.7729	14.257	1.48415	4.90441e-06	0.00192769	12.7031	12.7916	12.824	14.2392	14.2231	14.3088	Up
Q9BTU6	PI4K2A	Phosphatidylinositol 4-kinase type 2-alpha OS=Homo sapiens OX=9606 GN=PI4K2A PE=1 SV=1	15.3367	15.975	0.638217	5.35596e-06	0.00199992	15.3283	15.3456	15.3364	16.0117	15.9482	15.9649	Up
O94851	MICAL2	[F-actin]-monooxygenase MICAL2 OS=Homo sapiens OX=9606 GN=MICAL2 PE=1 SV=2	13.5155	14.3081	0.792585	6.10728e-06	0.00217187	13.4691	13.5263	13.5511	14.3165	14.2946	14.3132	Up
P78552	IL13RA1	Interleukin-13 receptor subunit alpha-1 OS=Homo sapiens OX=9606 GN=IL13RA1 PE=1 SV=1	12.5295	13.6206	1.09107	6.50837e-06	0.0022093	12.5072	12.5022	12.5792	13.6611	13.5749	13.6259	Up
Q13530	SERINC3	Serine incorporator 3 OS=Homo sapiens OX=9606 GN=SERINC3 PE=1 SV=2	13.6797	14.8824	1.20265	7.24014e-06	0.00235084	13.7027	13.6039	13.7326	14.8996	14.8688	14.8788	Up
Q9H5V8	CDCP1	CUB domain-containing protein 1 OS=Homo sapiens OX=9606 GN=CDCP1 PE=1 SV=3	15.4542	15.9276	0.473437	7.6955e-06	0.00239458	15.4599	15.476	15.4267	15.9301	15.9151	15.9378	Up
P30679	GNA15	Guanine nucleotide-binding protein subunit alpha-15 OS=Homo sapiens OX=9606 GN=GNA15 PE=1 SV=3	13.7593	14.0931	0.333764	8.73596e-06	0.00244856	13.7702	13.737	13.7706	14.0982	14.0942	14.0868	Up
Q04721	NOTCH2	Neurogenic locus notch homolog protein 2 OS=Homo sapiens OX=9606 GN=NOTCH2 PE=1 SV=3	14.2976	14.9358	0.638206	9.47817e-06	0.00252796	14.2773	14.3075	14.3079	14.8976	14.9668	14.9429	Up
P37173	TGFBR2	TGF-beta receptor type-2 OS=Homo sapiens OX=9606 GN=TGFBR2 PE=1 SV=2	13.6789	14.8829	1.204	1.01635e-05	0.00261727	13.6031	13.7296	13.7041	14.9102	14.8438	14.8948	Up
Q6P5R6	RPL22L1	60S ribosomal protein L22-like 1 OS=Homo sapiens OX=9606 GN=RPL22L1 PE=1 SV=2	14.4534	13.8578	-0.595659	1.07202e-05	0.00266862	14.4767	14.4591	14.4244	13.8886	13.8449	13.8397	Down
Q969X1	TMBIM1	Protein lifeguard 3 OS=Homo sapiens OX=9606 GN=TMBIM1 PE=1 SV=2	13.4064	13.8708	0.464374	1.17888e-05	0.00280592	13.4057	13.3788	13.4347	13.8812	13.8724	13.8587	Up
Q5SR56	MFSD14B	Hippocampus abundant transcript-like protein 1 OS=Homo sapiens OX=9606 GN=MFSD14B PE=1 SV=3	11.812	12.625	0.813077	1.20232e-05	0.00280592	11.7579	11.8158	11.8622	12.6235	12.6353	12.6163	Up
Q06481	APLP2	Amyloid beta precursor like protein 2 OS=Homo sapiens OX=9606 GN=APLP2 PE=1 SV=2	16.2223	17.1841	0.961793	1.29826e-05	0.00293414	16.1638	16.2771	16.2259	17.1672	17.1667	17.2184	Up
Q08431	MFGE8	Lactadherin OS=Homo sapiens OX=9606 GN=MFGE8 PE=1 SV=3	11.1981	11.8793	0.681256	1.38683e-05	0.00293414	11.1971	11.2249	11.1722	11.8896	11.8374	11.911	Up
O60825	PFKFB2	6-phosphofructo-2-kinase/fructose-2,6-bisphosphatase 2 OS=Homo sapiens OX=9606 GN=PFKFB2 PE=1 SV=2	15.9031	16.242	0.338934	1.45172e-05	0.00293414	15.9266	15.8821	15.9007	16.2354	16.2427	16.2481	Up
Q9NUM4	TMEM106B	Transmembrane protein 106B OS=Homo sapiens OX=9606 GN=TMEM106B PE=1 SV=2	14.0994	14.6798	0.580405	1.47695e-05	0.00293414	14.1157	14.0591	14.1234	14.6651	14.6731	14.7012	Up
Q9ULH7	MRTFB	Myocardin-related transcription factor B OS=Homo sapiens OX=9606 GN=MRTFB PE=1 SV=3	14.5278	14.2246	-0.303128	1.493e-05	0.00293414	14.5122	14.547	14.5242	14.2341	14.2124	14.2275	Down
P04062	GBA1	Lysosomal acid glucosylceramidase OS=Homo sapiens OX=9606 GN=GBA1 PE=1 SV=3	15.65	15.0403	-0.609711	1.55937e-05	0.00298599	15.6787	15.6431	15.6281	15.0698	15.0036	15.0474	Down
Q9BT67	NDFIP1	NEDD4 family-interacting protein 1 OS=Homo sapiens OX=9606 GN=NDFIP1 PE=1 SV=1	12.2839	13.6755	1.39153	1.62982e-05	0.00304288	12.2381	12.3698	12.2439	13.6295	13.6484	13.7485	Up
P04114	APOB	Apolipoprotein B-100 OS=Homo sapiens OX=9606 GN=APOB PE=1 SV=2	14.9136	16.7754	1.86183	1.70213e-05	0.00310037	14.8626	14.9533	14.925	16.6858	16.7231	16.9174	Up
Q3MIP1	ITPRIPL2	Inositol 1,4,5-trisphosphate receptor-interacting protein-like 2 OS=Homo sapiens OX=9606 GN=ITPRIPL2 PE=1 SV=1	13.8883	14.5047	0.616407	1.77085e-05	0.00314874	13.9224	13.8408	13.9017	14.4936	14.5015	14.5191	Up
P30530	AXL	Tyrosine-protein kinase receptor UFO OS=Homo sapiens OX=9606 GN=AXL PE=1 SV=4	15.9526	16.8963	0.943696	1.86493e-05	0.00320958	15.8964	15.949	16.0123	16.8576	16.8998	16.9314	Up
P13501	CCL5	C-C motif chemokine 5 OS=Homo sapiens OX=9606 GN=CCL5 PE=1 SV=3	10.3707	11.9748	1.6041	1.89102e-05	0.00320958	10.3736	10.3687	10.3698	12.0306	11.8399	12.0539	Up
P15514	AREG	Amphiregulin OS=Homo sapiens OX=9606 GN=AREG PE=1 SV=2	9.87841	11.2915	1.41311	2.03162e-05	0.00329829	9.95944	9.7786	9.89718	11.3238	11.2321	11.3186	Up
Q9UBW7	ZMYM2	Zinc finger MYM-type protein 2 OS=Homo sapiens OX=9606 GN=ZMYM2 PE=1 SV=1	15.9518	15.6473	-0.30453	2.21195e-05	0.00343429	15.9529	15.9539	15.9487	15.6279	15.6727	15.6412	Down
Q96J02	ITCH	E3 ubiquitin-protein ligase Itchy homolog OS=Homo sapiens OX=9606 GN=ITCH PE=1 SV=2	16.3083	16.5859	0.27762	2.21577e-05	0.00343429	16.285	16.3242	16.3157	16.5809	16.5896	16.5873	Up
Q9NV92	NDFIP2	NEDD4 family-interacting protein 2 OS=Homo sapiens OX=9606 GN=NDFIP2 PE=1 SV=2	13.3545	15.1171	1.76255	2.25335e-05	0.00343429	13.221	13.3857	13.4569	15.0487	15.1571	15.1454	Up
P55082	MFAP3	Microfibril-associated glycoprotein 3 OS=Homo sapiens OX=9606 GN=MFAP3 PE=1 SV=1	11.9466	13.2963	1.34964	2.42057e-05	0.00351387	11.9143	12.0055	11.9202	13.3086	13.1989	13.3814	Up
O00560	SDCBP	Syntenin-1 OS=Homo sapiens OX=9606 GN=SDCBP PE=1 SV=1	13.7021	14.6301	0.927948	2.42988e-05	0.00351387	13.6784	13.7751	13.6528	14.6611	14.5958	14.6333	Up
P18827	SDC1	Syndecan-1 OS=Homo sapiens OX=9606 GN=SDC1 PE=1 SV=3	13.5037	14.2668	0.763109	2.48178e-05	0.00351387	13.4366	13.5239	13.5506	14.2629	14.2653	14.2722	Up
Q96GS6	ABHD17A	Alpha/beta hydrolase domain-containing protein 17A OS=Homo sapiens OX=9606 GN=ABHD17A PE=1 SV=1	11.3171	14.4267	3.10965	2.66667e-05	0.00362085	11.4312	11.1813	11.3387	14.277	14.3318	14.6713	Up
Q96MC6	MFSD14A	Hippocampus abundant transcript 1 protein OS=Homo sapiens OX=9606 GN=MFSD14A PE=1 SV=2	11.1502	12.3116	1.16141	2.80422e-05	0.00368302	11.0923	11.2356	11.1227	12.3535	12.333	12.2483	Up
Q15043	SLC39A14	Metal cation symporter ZIP14 OS=Homo sapiens OX=9606 GN=SLC39A14 PE=1 SV=3	15.0773	15.5607	0.483386	2.81109e-05	0.00368302	15.0505	15.1031	15.0783	15.5322	15.5598	15.5901	Up
P58335	ANTXR2	Anthrax toxin receptor 2 OS=Homo sapiens OX=9606 GN=ANTXR2 PE=1 SV=5	11.918	13.2763	1.35829	3.31918e-05	0.00413367	11.9338	11.9664	11.8538	13.2312	13.2081	13.3896	Up
Q96PU5	NEDD4L	E3 ubiquitin-protein ligase NEDD4-like OS=Homo sapiens OX=9606 GN=NEDD4L PE=1 SV=2	15.9605	16.5257	0.565134	3.72451e-05	0.00448623	15.9613	15.9579	15.9623	16.5041	16.4911	16.5817	Up
P05067	APP	Amyloid-beta precursor protein OS=Homo sapiens OX=9606 GN=APP PE=1 SV=3	15.4083	15.9155	0.507194	3.91869e-05	0.00453229	15.4094	15.4193	15.3962	15.8753	15.9102	15.9609	Up
Q5W0Z9	ZDHHC20	Palmitoyltransferase ZDHHC20 OS=Homo sapiens OX=9606 GN=ZDHHC20 PE=1 SV=1	13.4489	14.0163	0.567405	3.95725e-05	0.00453229	13.4297	13.4982	13.4189	13.9879	14.0236	14.0374	Up
Q96TA2	YME1L1	ATP-dependent zinc metalloprotease YME1L1 OS=Homo sapiens OX=9606 GN=YME1L1 PE=1 SV=2	15.4136	16.1194	0.705867	4.00551e-05	0.00453229	15.3507	15.443	15.4469	16.1546	16.101	16.1027	Up
Q8IWT6	LRRC8A	Volume-regulated anion channel subunit LRRC8A OS=Homo sapiens OX=9606 GN=LRRC8A PE=1 SV=1	15.6812	15.9717	0.290558	4.26175e-05	0.00462917	15.7005	15.6605	15.6825	15.9573	15.9677	15.9901	Up
Q9NZV1	CRIM1	Cysteine-rich motor neuron 1 protein OS=Homo sapiens OX=9606 GN=CRIM1 PE=1 SV=1	12.6279	13.8252	1.19728	4.33907e-05	0.00462917	12.5275	12.7334	12.6228	13.7904	13.8305	13.8546	Up
Q04771	ACVR1	Activin receptor type-1 OS=Homo sapiens OX=9606 GN=ACVR1 PE=1 SV=1	12.2446	12.7661	0.521527	4.5201e-05	0.00475438	12.2271	12.278	12.2286	12.7259	12.7717	12.8007	Up
Q8NC26	ZNF114	Zinc finger protein 114 OS=Homo sapiens OX=9606 GN=ZNF114 PE=1 SV=1	14	15.5651	1.56503	5.06341e-05	0.00512395	14.1523	13.9048	13.943	15.4986	15.6203	15.5763	Up
Q9NU53	GINM1	Glycoprotein integral membrane protein 1 OS=Homo sapiens OX=9606 GN=GINM1 PE=1 SV=1	12.7542	14.0364	1.28226	5.11658e-05	0.00512395	12.6256	12.8237	12.8132	14.0354	13.991	14.083	Up
P56945	BCAR1	Breast cancer anti-estrogen resistance protein 1 OS=Homo sapiens OX=9606 GN=BCAR1 PE=1 SV=2	16.1509	16.4303	0.279456	5.14373e-05	0.00512395	16.1795	16.1323	16.1409	16.4364	16.4329	16.4217	Up
Q14512	FGFBP1	Fibroblast growth factor-binding protein 1 OS=Homo sapiens OX=9606 GN=FGFBP1 PE=1 SV=1	12.8639	14.331	1.46707	5.16673e-05	0.00512395	12.714	12.9105	12.9672	14.3655	14.2897	14.3377	Up
Q96B97	SH3KBP1	SH3 domain-containing kinase-binding protein 1 OS=Homo sapiens OX=9606 GN=SH3KBP1 PE=1 SV=2	16.4298	16.9048	0.475006	5.21451e-05	0.00512395	16.438	16.4459	16.4054	16.8594	16.931	16.9239	Up
P53801	PTTG1IP	Pituitary tumor-transforming gene 1 protein-interacting protein OS=Homo sapiens OX=9606 GN=PTTG1IP PE=1 SV=1	13.3434	14.1569	0.813487	5.30061e-05	0.0051409	13.3247	13.3711	13.3343	14.104	14.2404	14.1262	Up
Q9NUJ3	TCP11L1	T-complex protein 11-like protein 1 OS=Homo sapiens OX=9606 GN=TCP11L1 PE=1 SV=1	15.9807	15.6811	-0.299618	5.41417e-05	0.00518372	16.003	15.9866	15.9524	15.6952	15.6732	15.6748	Down
Q14134	TRIM29	Tripartite motif-containing protein 29 OS=Homo sapiens OX=9606 GN=TRIM29 PE=1 SV=2	18.0059	17.1472	-0.858754	5.52823e-05	0.00522593	18.051	18.0324	17.9344	17.1973	17.1534	17.0908	Down
O60488	ACSL4	Long-chain-fatty-acid--CoA ligase 4 OS=Homo sapiens OX=9606 GN=ACSL4 PE=1 SV=2	16.7544	17.1629	0.408437	5.66146e-05	0.00528497	16.7167	16.7596	16.787	17.1817	17.148	17.1588	Up
O75509	TNFRSF21	Tumor necrosis factor receptor superfamily member 21 OS=Homo sapiens OX=9606 GN=TNFRSF21 PE=1 SV=1	10.7183	12.0885	1.37018	5.96623e-05	0.00542158	10.6026	10.8414	10.7109	12.0191	12.1301	12.1163	Up
Q9BY50	SEC11C	Signal peptidase complex catalytic subunit SEC11C OS=Homo sapiens OX=9606 GN=SEC11C PE=1 SV=3	12.7712	13.1923	0.421002	5.97592e-05	0.00542158	12.7379	12.7692	12.8067	13.2046	13.206	13.1662	Up
O60487	MPZL2	Myelin protein zero-like protein 2 OS=Homo sapiens OX=9606 GN=MPZL2 PE=1 SV=1	13.0083	13.5883	0.580014	6.11645e-05	0.00542158	13.0259	12.9517	13.0472	13.6099	13.5974	13.5576	Up
Q6ZWT7	MBOAT2	Lysophospholipid acyltransferase 2 OS=Homo sapiens OX=9606 GN=MBOAT2 PE=1 SV=2	13.3059	13.7243	0.418478	6.35543e-05	0.00542158	13.3342	13.3103	13.2731	13.7514	13.6956	13.726	Up
Q9UMX5	NENF	Neudesin OS=Homo sapiens OX=9606 GN=NENF PE=1 SV=1	16.4402	16.1389	-0.301334	6.35852e-05	0.00542158	16.4593	16.4229	16.4386	16.1663	16.1237	16.1267	Down
Q9Y287	ITM2B	Integral membrane protein 2B OS=Homo sapiens OX=9606 GN=ITM2B PE=1 SV=1	12.0075	13.2048	1.19729	6.43575e-05	0.00542158	11.968	11.9525	12.1021	13.154	13.1558	13.3046	Up
P04637	TP53	Cellular tumor antigen p53 OS=Homo sapiens OX=9606 GN=TP53 PE=1 SV=4	16.822	16.5067	-0.315248	6.45281e-05	0.00542158	16.8513	16.7913	16.8234	16.5101	16.5139	16.4962	Down
Q9ULG6	CCPG1	Cell cycle progression protein 1 OS=Homo sapiens OX=9606 GN=CCPG1 PE=1 SV=3	12.7472	13.4962	0.749035	6.48002e-05	0.00542158	12.6749	12.7539	12.8128	13.5131	13.4634	13.5121	Up
P21980	TGM2	Protein-glutamine gamma-glutamyltransferase 2 OS=Homo sapiens OX=9606 GN=TGM2 PE=1 SV=2	18.1558	18.7159	0.560106	6.53378e-05	0.00542158	18.2154	18.1317	18.1204	18.7095	18.7395	18.6988	Up
O60292	SIPA1L3	Signal-induced proliferation-associated 1-like protein 3 OS=Homo sapiens OX=9606 GN=SIPA1L3 PE=1 SV=3	16.4278	16.7576	0.329739	6.90627e-05	0.00554738	16.4315	16.4285	16.4235	16.7264	16.7925	16.7538	Up
O43291	SPINT2	Kunitz-type protease inhibitor 2 OS=Homo sapiens OX=9606 GN=SPINT2 PE=1 SV=2	15.1739	16.3195	1.14563	6.90822e-05	0.00554738	15.0467	15.2683	15.2066	16.3215	16.298	16.339	Up
Q9UI32	GLS2	Glutaminase liver isoform, mitochondrial OS=Homo sapiens OX=9606 GN=GLS2 PE=1 SV=2	10.3646	10.0647	-0.299881	7.5538e-05	0.00593808	10.3454	10.3491	10.3993	10.0737	10.0615	10.0591	Down
Q86W74	ANKRD46	Ankyrin repeat domain-containing protein 46 OS=Homo sapiens OX=9606 GN=ANKRD46 PE=1 SV=2	12.2098	12.8742	0.664469	8.13759e-05	0.0062651	12.1338	12.2625	12.233	12.8648	12.8609	12.897	Up
Q9P2D0	IBTK	Inhibitor of Bruton tyrosine kinase OS=Homo sapiens OX=9606 GN=IBTK PE=1 SV=3	14.725	14.4403	-0.284622	8.45643e-05	0.00642375	14.7499	14.713	14.712	14.4494	14.4556	14.4159	Down
Q16222	UAP1	UDP-N-acetylhexosamine pyrophosphorylase OS=Homo sapiens OX=9606 GN=UAP1 PE=1 SV=3	16.1622	16.5942	0.431965	8.69457e-05	0.00642375	16.1221	16.195	16.1695	16.5656	16.5952	16.6217	Up
P13796	LCP1	Plastin-2 OS=Homo sapiens OX=9606 GN=LCP1 PE=1 SV=6	18.1015	18.4269	0.325477	8.73969e-05	0.00642375	18.14	18.0921	18.0723	18.4272	18.4311	18.4226	Up
O95786	RIGI	Antiviral innate immune response receptor RIG-I OS=Homo sapiens OX=9606 GN=RIGI PE=1 SV=2	14.5201	14.8639	0.343746	8.79304e-05	0.00642375	14.5102	14.5595	14.4907	14.875	14.8533	14.8634	Up
Q08AI8	MAB21L4	Protein mab-21-like 4 OS=Homo sapiens OX=9606 GN=MAB21L4 PE=2 SV=2	12.2297	10.2507	-1.979	9.05041e-05	0.00642375	12.1273	12.4053	12.1566	10.4206	10.1305	10.2011	Down
P98155	VLDLR	Very low-density lipoprotein receptor OS=Homo sapiens OX=9606 GN=VLDLR PE=1 SV=1	12.9195	13.5005	0.580977	9.07717e-05	0.00642375	12.9107	12.9214	12.9265	13.4453	13.5686	13.4877	Up
Q9NP84	TNFRSF12A	Tumor necrosis factor receptor superfamily member 12A OS=Homo sapiens OX=9606 GN=TNFRSF12A PE=1 SV=1	12.5587	14.5468	1.98806	9.21127e-05	0.00642375	12.4091	12.6143	12.6527	14.3638	14.7076	14.5689	Up
Q8NG11	TSPAN14	Tetraspanin-14 OS=Homo sapiens OX=9606 GN=TSPAN14 PE=1 SV=1	14.3426	14.8108	0.468237	9.24689e-05	0.00642375	14.3087	14.3996	14.3193	14.817	14.797	14.8184	Up
P15153	RAC2	Ras-related C3 botulinum toxin substrate 2 OS=Homo sapiens OX=9606 GN=RAC2 PE=1 SV=1	14.076	14.7481	0.672039	9.2859e-05	0.00642375	14.0676	14.0393	14.1212	14.7118	14.7145	14.818	Up
Q6PIU2	NCEH1	Neutral cholesterol ester hydrolase 1 OS=Homo sapiens OX=9606 GN=NCEH1 PE=1 SV=3	15.8748	16.2215	0.346621	9.4315e-05	0.00642375	15.9002	15.8601	15.8643	16.1921	16.2539	16.2184	Up
P16070	CD44	CD44 antigen OS=Homo sapiens OX=9606 GN=CD44 PE=1 SV=3	16.7009	17.4419	0.740942	9.48421e-05	0.00642375	16.6526	16.6837	16.7665	17.4102	17.4084	17.5069	Up
Q969W9	PMEPA1	Protein TMEPAI OS=Homo sapiens OX=9606 GN=PMEPA1 PE=1 SV=1	9.78385	11.1282	1.34439	9.49495e-05	0.00642375	9.87297	9.6717	9.8069	11.1514	11.0121	11.2212	Up
O14879	IFIT3	Interferon-induced protein with tetratricopeptide repeats 3 OS=Homo sapiens OX=9606 GN=IFIT3 PE=1 SV=1	15.3952	16.5294	1.13419	9.54789e-05	0.00642375	15.5388	15.3245	15.3224	16.5333	16.5387	16.5162	Up
P50281	MMP14	Matrix metalloproteinase-14 OS=Homo sapiens OX=9606 GN=MMP14 PE=1 SV=3	15.1425	15.7414	0.598891	0.000100762	0.0067187	15.1613	15.1001	15.1663	15.7182	15.7011	15.8051	Up
Q6ZV73	FGD6	FYVE, RhoGEF and PH domain-containing protein 6 OS=Homo sapiens OX=9606 GN=FGD6 PE=1 SV=2	13.5745	13.8816	0.307083	0.00010481	0.00688709	13.5437	13.5812	13.5986	13.9051	13.87	13.8697	Up
Q16760	DGKD	Diacylglycerol kinase delta OS=Homo sapiens OX=9606 GN=DGKD PE=1 SV=4	10.1306	11.1366	1.00599	0.000105132	0.00688709	10.0499	10.1273	10.2148	11.1978	11.0488	11.1632	Up
Q8NCS4	TMEM35B	Transmembrane protein 35B OS=Homo sapiens OX=9606 GN=TMEM35B PE=1 SV=1	12.3258	13.0199	0.694046	0.000107863	0.00700454	12.3656	12.306	12.3059	13.0807	13.0369	12.942	Up
O43688	PLPP2	Phospholipid phosphatase 2 OS=Homo sapiens OX=9606 GN=PLPP2 PE=1 SV=1	14.2823	14.8165	0.534237	0.000109826	0.00707055	14.2963	14.3253	14.2251	14.8004	14.7951	14.8539	Up
Q9NY26	SLC39A1	Zinc transporter ZIP1 OS=Homo sapiens OX=9606 GN=SLC39A1 PE=1 SV=1	11.5576	12.9207	1.36302	0.000111914	0.00714339	11.5131	11.4813	11.6785	12.8492	13.0533	12.8595	Up
P02794	FTH1	Ferritin heavy chain OS=Homo sapiens OX=9606 GN=FTH1 PE=1 SV=2	13.9679	15.247	1.27911	0.000113461	0.00718073	14.0054	13.9649	13.9333	15.4117	15.1647	15.1645	Up
P46531	NOTCH1	Neurogenic locus notch homolog protein 1 OS=Homo sapiens OX=9606 GN=NOTCH1 PE=1 SV=4	11.5564	11.9504	0.394021	0.000115045	0.00718479	11.5336	11.5763	11.5593	11.9557	11.9876	11.908	Up
Q8WUM9	SLC20A1	Sodium-dependent phosphate transporter 1 OS=Homo sapiens OX=9606 GN=SLC20A1 PE=1 SV=1	14.1924	15.2446	1.05225	0.000116928	0.00718479	14.0589	14.2435	14.2748	15.2389	15.2828	15.2123	Up
P98194	ATP2C1	Calcium-transporting ATPase type 2C member 1 OS=Homo sapiens OX=9606 GN=ATP2C1 PE=1 SV=3	15.8238	16.2633	0.439529	0.000117359	0.00718479	15.7866	15.867	15.8178	16.2745	16.2872	16.2283	Up
Q9NQY0	BIN3	Bridging integrator 3 OS=Homo sapiens OX=9606 GN=BIN3 PE=1 SV=1	14.414	14.7075	0.293443	0.000117461	0.00718479	14.4208	14.4329	14.3884	14.7364	14.6911	14.695	Up
Q9NYL2	MAP3K20	Mitogen-activated protein kinase kinase kinase 20 OS=Homo sapiens OX=9606 GN=MAP3K20 PE=1 SV=3	15.6839	15.9492	0.265255	0.000120831	0.00719614	15.6987	15.6647	15.6883	15.932	15.9787	15.9368	Up
P83111	LACTB	Serine beta-lactamase-like protein LACTB, mitochondrial OS=Homo sapiens OX=9606 GN=LACTB PE=1 SV=2	15.9103	16.3252	0.414882	0.00012119	0.00719614	15.9455	15.8585	15.9269	16.309	16.3254	16.3412	Up
Q96IF1	AJUBA	LIM domain-containing protein ajuba OS=Homo sapiens OX=9606 GN=AJUBA PE=1 SV=1	16.7894	16.3596	-0.429795	0.000121413	0.00719614	16.8153	16.7758	16.7772	16.4035	16.3619	16.3135	Down
P22223	CDH3	Cadherin-3 OS=Homo sapiens OX=9606 GN=CDH3 PE=1 SV=2	15.8262	16.2587	0.432528	0.000126122	0.00734103	15.7891	15.8154	15.8741	16.2498	16.2889	16.2375	Up
Q92783	STAM	Signal transducing adapter molecule 1 OS=Homo sapiens OX=9606 GN=STAM PE=1 SV=3	15.3452	15.6489	0.303706	0.000126807	0.00734103	15.3252	15.371	15.3393	15.6729	15.6193	15.6545	Up
O15118	NPC1	NPC intracellular cholesterol transporter 1 OS=Homo sapiens OX=9606 GN=NPC1 PE=1 SV=2	14.5013	15.2774	0.776091	0.000132285	0.00754123	14.5795	14.5085	14.4159	15.2929	15.3109	15.2283	Up
Q96RD7	PANX1	Pannexin-1 OS=Homo sapiens OX=9606 GN=PANX1 PE=1 SV=4	14.5253	14.91	0.38469	0.000133841	0.00756679	14.5367	14.5331	14.5061	14.9226	14.862	14.9453	Up
P15260	IFNGR1	Interferon gamma receptor 1 OS=Homo sapiens OX=9606 GN=IFNGR1 PE=1 SV=1	12.7315	14.054	1.32248	0.000134759	0.00756679	12.6457	12.9048	12.6442	14.113	14.0123	14.0367	Up
Q96I23	PYURF	Protein preY, mitochondrial OS=Homo sapiens OX=9606 GN=PYURF PE=1 SV=1	12.7366	13.0262	0.2896	0.000135809	0.00756881	12.739	12.7009	12.7699	13.026	13.0306	13.022	Up
Q96M89	CCDC138	Coiled-coil domain-containing protein 138 OS=Homo sapiens OX=9606 GN=CCDC138 PE=1 SV=1	12.9501	14.252	1.30188	0.000138198	0.00764492	12.8477	12.9897	13.013	14.1558	14.2009	14.3994	Up
Q9BQE5	APOL2	Apolipoprotein L2 OS=Homo sapiens OX=9606 GN=APOL2 PE=1 SV=2	16.2213	15.9431	-0.278227	0.00013956	0.00766348	16.2229	16.2357	16.2053	15.9415	15.9739	15.9137	Down
Q9NRA2	SLC17A5	Sialin OS=Homo sapiens OX=9606 GN=SLC17A5 PE=1 SV=2	14.2464	14.7074	0.461033	0.000148961	0.00794603	14.2171	14.2367	14.2855	14.7554	14.6672	14.6996	Up
Q8TBA6	GOLGA5	Golgin subfamily A member 5 OS=Homo sapiens OX=9606 GN=GOLGA5 PE=1 SV=3	17.1395	17.404	0.264469	0.000152052	0.00805339	17.1757	17.1278	17.115	17.3958	17.4094	17.4067	Up
P16083	NQO2	Ribosyldihydronicotinamide dehydrogenase [quinone] OS=Homo sapiens OX=9606 GN=NQO2 PE=1 SV=5	13.4259	13.1472	-0.278728	0.000154026	0.00810045	13.4313	13.3923	13.454	13.1448	13.1633	13.1334	Down
O43157	PLXNB1	Plexin-B1 OS=Homo sapiens OX=9606 GN=PLXNB1 PE=1 SV=3	12.9387	12.6667	-0.271991	0.000155383	0.00811469	12.9531	12.9108	12.9521	12.6537	12.6522	12.6942	Down
P04439	HLA-A	HLA class I histocompatibility antigen, A alpha chain OS=Homo sapiens OX=9606 GN=HLA-A PE=1 SV=2	15.5179	15.8598	0.341841	0.000158323	0.00816095	15.5545	15.5006	15.4987	15.891	15.8344	15.8539	Up
P31483	TIA1	Cytotoxic granule associated RNA binding protein TIA1 OS=Homo sapiens OX=9606 GN=TIA1 PE=1 SV=3	14.0948	13.7289	-0.365947	0.000158454	0.00816095	14.0563	14.0832	14.145	13.7304	13.7335	13.7228	Down
Q9BV57	ADI1	Acireductone dioxygenase OS=Homo sapiens OX=9606 GN=ADI1 PE=1 SV=1	17.1639	16.8242	-0.339745	0.000164922	0.00837719	17.145	17.1987	17.148	16.8452	16.8383	16.7891	Down
P02795	MT2A	Metallothionein-2 OS=Homo sapiens OX=9606 GN=MT2A PE=1 SV=1	17.1322	18.3692	1.23699	0.000165239	0.00837719	16.9573	17.2075	17.2319	18.3258	18.389	18.3928	Up
P08708	RPS17	40S ribosomal protein S17 OS=Homo sapiens OX=9606 GN=RPS17 PE=1 SV=2	17.5065	17.0931	-0.413401	0.000166018	0.00837719	17.4725	17.5083	17.5386	17.1277	17.1032	17.0484	Down
Q86VI4	LAPTM4B	Lysosomal-associated transmembrane protein 4B OS=Homo sapiens OX=9606 GN=LAPTM4B PE=1 SV=2	12.0825	12.825	0.742435	0.000173877	0.00859945	11.9924	12.1181	12.1371	12.8369	12.8717	12.7663	Up
Q9Y342	PLLP	Plasmolipin OS=Homo sapiens OX=9606 GN=PLLP PE=1 SV=1	11.6178	12.3976	0.779888	0.000177121	0.00864534	11.7056	11.517	11.6307	12.3702	12.3888	12.4339	Up
Q9Y6E2	BZW2	eIF5-mimic protein 1 OS=Homo sapiens OX=9606 GN=BZW2 PE=1 SV=1	17.7339	17.4655	-0.268399	0.000179322	0.00869595	17.7027	17.7599	17.7392	17.4855	17.4638	17.4473	Down
Q9UHE8	STEAP1	Metalloreductase STEAP1 OS=Homo sapiens OX=9606 GN=STEAP1 PE=1 SV=1	11.7834	12.3786	0.595134	0.000180862	0.00871404	11.8145	11.8054	11.7304	12.4005	12.3088	12.4264	Up
P78347	GTF2I	General transcription factor II-I OS=Homo sapiens OX=9606 GN=GTF2I PE=1 SV=2	18.9808	18.6221	-0.358661	0.000187673	0.00887053	18.9338	19.0151	18.9936	18.6291	18.6384	18.5989	Down
P15291	B4GALT1	Beta-1,4-galactosyltransferase 1 OS=Homo sapiens OX=9606 GN=B4GALT1 PE=1 SV=5	15.2466	14.9371	-0.309527	0.000191653	0.0089454	15.2672	15.2613	15.2112	14.9393	14.9625	14.9094	Down
P49768	PSEN1	Presenilin-1 OS=Homo sapiens OX=9606 GN=PSEN1 PE=1 SV=1	14.6106	14.9969	0.386327	0.000193532	0.00897701	14.6341	14.5731	14.6245	15.0342	15	14.9565	Up
P17096	HMGA1	High mobility group protein HMG-I/HMG-Y OS=Homo sapiens OX=9606 GN=HMGA1 PE=1 SV=3	16.4321	16.8853	0.453244	0.000196204	0.00904477	16.4907	16.4277	16.3779	16.8946	16.8625	16.8989	Up
Q99650	OSMR	Oncostatin-M-specific receptor subunit beta OS=Homo sapiens OX=9606 GN=OSMR PE=1 SV=1	13.4024	14.0606	0.658174	0.000198122	0.00907713	13.3458	13.3852	13.4763	14.0555	14.0073	14.1189	Up
Q16762	TST	Thiosulfate sulfurtransferase OS=Homo sapiens OX=9606 GN=TST PE=1 SV=4	15.0932	14.6588	-0.434436	0.000206749	0.00941467	15.1294	15.1031	15.0471	14.6642	14.6961	14.6161	Down
Q969Z4	RELT	Tumor necrosis factor receptor superfamily member 19L OS=Homo sapiens OX=9606 GN=RELT PE=1 SV=1	11.0306	12.2347	1.20414	0.000211156	0.00955704	10.8711	11.0808	11.1398	12.2505	12.1482	12.3054	Up
Q56VL3	OCIAD2	OCIA domain-containing protein 2 OS=Homo sapiens OX=9606 GN=OCIAD2 PE=1 SV=1	15.525	15.956	0.431082	0.000231523	0.0101351	15.4725	15.5431	15.5592	15.9138	15.9855	15.9689	Up
Q6RFH5	WDR74	WD repeat-containing protein 74 OS=Homo sapiens OX=9606 GN=WDR74 PE=1 SV=1	16.0048	16.3061	0.301291	0.000232814	0.0101351	16.0253	15.9974	15.9919	16.2628	16.3289	16.3267	Up
O00461	GOLIM4	Golgi integral membrane protein 4 OS=Homo sapiens OX=9606 GN=GOLIM4 PE=1 SV=1	15.5848	15.2578	-0.327009	0.000235958	0.0101351	15.589	15.5571	15.6084	15.2802	15.2149	15.2784	Down
Q9Y223	GNE	Bifunctional UDP-N-acetylglucosamine 2-epimerase/N-acetylmannosamine kinase OS=Homo sapiens OX=9606 GN=GNE PE=1 SV=1	13.6014	13.953	0.351543	0.000238869	0.0101351	13.5574	13.6209	13.626	13.9585	13.9803	13.9201	Up
P09234	SNRPC	U1 small nuclear ribonucleoprotein C OS=Homo sapiens OX=9606 GN=SNRPC PE=1 SV=1	15.5967	15.0693	-0.527345	0.00024157	0.0101351	15.6332	15.5947	15.5621	15.1396	15.0132	15.0552	Down
P01583	IL1A	Interleukin-1 alpha OS=Homo sapiens OX=9606 GN=IL1A PE=1 SV=1	12.5637	13.9828	1.41911	0.000251641	0.010367	12.6592	12.3946	12.6372	13.85	14.1213	13.977	Up
O14678	ABCD4	Lysosomal cobalamin transporter ABCD4 OS=Homo sapiens OX=9606 GN=ABCD4 PE=1 SV=1	12.2122	12.5761	0.363979	0.000256495	0.010367	12.2622	12.2116	12.1626	12.5741	12.5903	12.564	Up
Q9BVX2	TMEM106C	Transmembrane protein 106C OS=Homo sapiens OX=9606 GN=TMEM106C PE=1 SV=1	12.776	13.5081	0.732126	0.000260004	0.010367	12.6784	12.8798	12.7698	13.4893	13.4978	13.5373	Up
O60911	CTSV	Cathepsin L2 OS=Homo sapiens OX=9606 GN=CTSV PE=1 SV=2	12.5507	13.1987	0.647981	0.000262006	0.010367	12.6024	12.5904	12.4593	13.2298	13.1445	13.2217	Up
Q15392	DHCR24	Delta(24)-sterol reductase OS=Homo sapiens OX=9606 GN=DHCR24 PE=1 SV=2	16.109	16.4792	0.37014	0.000265871	0.010367	16.0924	16.1014	16.1333	16.506	16.5082	16.4234	Up
Q7Z4F1	LRP10	Low-density lipoprotein receptor-related protein 10 OS=Homo sapiens OX=9606 GN=LRP10 PE=1 SV=2	12.9632	13.9561	0.992975	0.000266272	0.010367	12.8223	13.0587	13.0084	14.0122	13.8803	13.9759	Up
P98179	RBM3	RNA-binding protein 3 OS=Homo sapiens OX=9606 GN=RBM3 PE=1 SV=1	16.6206	16.2545	-0.366092	0.000268707	0.010367	16.5779	16.6242	16.6596	16.2864	16.2562	16.2209	Down
Q8NC54	KCT2	Keratinocyte-associated transmembrane protein 2 OS=Homo sapiens OX=9606 GN=KCT2 PE=1 SV=2	14.491	15.0939	0.602913	0.000269554	0.010367	14.3925	14.553	14.5275	15.0865	15.0967	15.0986	Up
Q8IVF2	AHNAK2	Protein AHNAK2 OS=Homo sapiens OX=9606 GN=AHNAK2 PE=1 SV=2	17.0017	17.4482	0.446515	0.000270063	0.010367	17.0598	16.9846	16.9606	17.4146	17.4408	17.4891	Up
Q9NQX7	ITM2C	Integral membrane protein 2C OS=Homo sapiens OX=9606 GN=ITM2C PE=1 SV=1	12.4427	13.182	0.739365	0.000272086	0.010367	12.489	12.4359	12.4032	13.2712	13.0786	13.1963	Up
Q8IWR1	TRIM59	Tripartite motif-containing protein 59 OS=Homo sapiens OX=9606 GN=TRIM59 PE=1 SV=1	13.3553	13.9729	0.6176	0.000278788	0.0105685	13.3555	13.3463	13.3641	13.9282	13.9153	14.0753	Up
Q9BXS4	TMEM59	Transmembrane protein 59 OS=Homo sapiens OX=9606 GN=TMEM59 PE=1 SV=1	12.8547	13.7494	0.894738	0.000282079	0.0105882	12.97	12.8698	12.7243	13.7578	13.706	13.7844	Up
P11169	SLC2A3	Solute carrier family 2, facilitated glucose transporter member 3 OS=Homo sapiens OX=9606 GN=SLC2A3 PE=1 SV=1	14.3709	15.1982	0.827229	0.000282143	0.0105882	14.2375	14.4078	14.4675	15.2091	15.2013	15.1841	Up
Q16270	IGFBP7	Insulin-like growth factor-binding protein 7 OS=Homo sapiens OX=9606 GN=IGFBP7 PE=1 SV=1	13.3922	14.0512	0.658989	0.000291621	0.0106811	13.4345	13.3417	13.4003	14.0607	14.1303	13.9626	Up
Q15022	SUZ12	Polycomb protein SUZ12 OS=Homo sapiens OX=9606 GN=SUZ12 PE=1 SV=3	14.9612	15.5169	0.555728	0.000291674	0.0106811	14.8956	14.9709	15.0169	15.51	15.4671	15.5735	Up
Q96PD2	DCBLD2	Discoidin, CUB and LCCL domain-containing protein 2 OS=Homo sapiens OX=9606 GN=DCBLD2 PE=1 SV=1	12.1339	13.1325	0.998516	0.000294332	0.0106811	12.0536	12.1666	12.1816	13.0133	13.1152	13.2689	Up
Q8IWT3	CUL9	Cullin-9 OS=Homo sapiens OX=9606 GN=CUL9 PE=1 SV=2	12.9694	12.3624	-0.606988	0.00029775	0.0106974	13.0075	12.9701	12.9305	12.4223	12.3941	12.2708	Down
Q9ULQ0	STRIP2	Striatin-interacting protein 2 OS=Homo sapiens OX=9606 GN=STRIP2 PE=1 SV=2	13.3893	13.7479	0.358543	0.000310524	0.0110428	13.3947	13.3549	13.4184	13.6991	13.7777	13.7668	Up
P00749	PLAU	Urokinase-type plasminogen activator OS=Homo sapiens OX=9606 GN=PLAU PE=1 SV=3	12.1394	13.0089	0.869471	0.000316265	0.011085	12.0295	12.2225	12.1662	12.9506	12.9712	13.1049	Up
Q9BS91	SLC35A5	Probable UDP-sugar transporter protein SLC35A5 OS=Homo sapiens OX=9606 GN=SLC35A5 PE=1 SV=2	12.6231	13.2131	0.590069	0.000317209	0.011085	12.6697	12.6039	12.5957	13.2999	13.1476	13.1919	Up
P41273	TNFSF9	Tumor necrosis factor ligand superfamily member 9 OS=Homo sapiens OX=9606 GN=TNFSF9 PE=1 SV=1	12.2862	13.7738	1.48763	0.000317647	0.011085	12.0656	12.4159	12.3772	13.8302	13.8469	13.6445	Up
O75815	BCAR3	Breast cancer anti-estrogen resistance protein 3 OS=Homo sapiens OX=9606 GN=BCAR3 PE=1 SV=1	15.8936	16.3927	0.499063	0.000328811	0.0113202	15.8575	15.9081	15.9153	16.325	16.4618	16.3913	Up
Q96D05	FAM241B	Protein FAM241B OS=Homo sapiens OX=9606 GN=FAM241B PE=1 SV=1	14.3169	14.7779	0.46102	0.000328934	0.0113202	14.2549	14.3712	14.3244	14.8165	14.7414	14.7758	Up
Q7L592	NDUFAF7	Protein arginine methyltransferase NDUFAF7, mitochondrial OS=Homo sapiens OX=9606 GN=NDUFAF7 PE=1 SV=1	15.6657	15.3518	-0.313972	0.000332912	0.0114045	15.6859	15.6476	15.6637	15.3891	15.3621	15.3041	Down
Q9BPW9	DHRS9	Dehydrogenase/reductase SDR family member 9 OS=Homo sapiens OX=9606 GN=DHRS9 PE=1 SV=1	12.2757	13.001	0.725236	0.000335917	0.0114549	12.3736	12.2102	12.2434	12.9409	12.9869	13.0751	Up
Q6ZUT6	CCDC9B	Coiled-coil domain-containing protein 9B OS=Homo sapiens OX=9606 GN=CCDC9B PE=1 SV=1	14.9474	15.4376	0.490192	0.00033818	0.0114797	14.9582	14.917	14.9671	15.3981	15.3968	15.5179	Up
O00418	EEF2K	Eukaryotic elongation factor 2 kinase OS=Homo sapiens OX=9606 GN=EEF2K PE=1 SV=2	15.7108	15.3339	-0.376856	0.000340309	0.0114932	15.7598	15.7091	15.6633	15.3438	15.3587	15.2992	Down
P02655	APOC2	Apolipoprotein C-II OS=Homo sapiens OX=9606 GN=APOC2 PE=1 SV=1	10.9361	12.2326	1.29645	0.000341657	0.0114932	11.0638	10.7802	10.9644	12.3241	12.2967	12.0771	Up
O00151	PDLIM1	PDZ and LIM domain protein 1 OS=Homo sapiens OX=9606 GN=PDLIM1 PE=1 SV=4	17.7119	17.3872	-0.324707	0.00034975	0.0116206	17.6869	17.7045	17.7444	17.3898	17.426	17.3459	Down
Q9Y2Z2	MTO1	Protein MTO1 homolog, mitochondrial OS=Homo sapiens OX=9606 GN=MTO1 PE=1 SV=2	15.3269	15.0609	-0.265948	0.000351242	0.0116206	15.3454	15.3052	15.3301	15.0973	15.0266	15.0588	Down
Q9UMN6	KMT2B	Histone-lysine N-methyltransferase 2B OS=Homo sapiens OX=9606 GN=KMT2B PE=1 SV=1	12.7769	13.5937	0.816869	0.000353349	0.0116206	12.7934	12.8241	12.7132	13.4665	13.6391	13.6757	Up
Q9BQ24	ZFYVE21	Zinc finger FYVE domain-containing protein 21 OS=Homo sapiens OX=9606 GN=ZFYVE21 PE=1 SV=1	13.4346	14.4155	0.980937	0.000360511	0.0116206	13.2652	13.5571	13.4814	14.4107	14.4152	14.4207	Up
O75204	TMEM127	Transmembrane protein 127 OS=Homo sapiens OX=9606 GN=TMEM127 PE=1 SV=1	10.1643	11.3748	1.21048	0.000361004	0.0116206	10.0438	10.2675	10.1815	11.3184	11.2619	11.544	Up
P30740	SERPINB1	Leukocyte elastase inhibitor OS=Homo sapiens OX=9606 GN=SERPINB1 PE=1 SV=1	16.912	16.5069	-0.405095	0.00036485	0.0116716	16.9519	16.8428	16.9415	16.5271	16.4933	16.5004	Down
Q9UMD9	COL17A1	Collagen alpha-1(XVII) chain OS=Homo sapiens OX=9606 GN=COL17A1 PE=1 SV=3	15.432	16.0055	0.573586	0.000373524	0.0116716	15.4984	15.4493	15.3481	16.0452	16.0164	15.955	Up
Q9NZ42	PSENEN	Gamma-secretase subunit PEN-2 OS=Homo sapiens OX=9606 GN=PSENEN PE=1 SV=1	13.817	14.2929	0.475939	0.000377226	0.0116716	13.7598	13.8618	13.8293	14.3315	14.3149	14.2323	Up
Q9NWB1	RBFOX1	RNA binding protein fox-1 homolog 1 OS=Homo sapiens OX=9606 GN=RBFOX1 PE=1 SV=2	13.4899	12.7093	-0.780632	0.000379255	0.0116716	13.5861	13.4421	13.4415	12.8101	12.6783	12.6396	Down
O43657	TSPAN6	Tetraspanin-6 OS=Homo sapiens OX=9606 GN=TSPAN6 PE=1 SV=1	14.612	15.0136	0.401547	0.000380158	0.0116716	14.6143	14.6401	14.5816	14.9501	15.0364	15.0542	Up
P30837	ALDH1B1	Aldehyde dehydrogenase X, mitochondrial OS=Homo sapiens OX=9606 GN=ALDH1B1 PE=1 SV=4	15.2745	14.991	-0.283508	0.000381654	0.0116716	15.315	15.2581	15.2506	14.9995	14.9607	15.0129	Down
Q9NVC3	SLC38A7	Sodium-coupled neutral amino acid transporter 7 OS=Homo sapiens OX=9606 GN=SLC38A7 PE=1 SV=1	12.9817	13.2958	0.314157	0.000382907	0.0116716	12.9902	13.0086	12.9462	13.3385	13.2802	13.2688	Up
Q9Y3B1	PRELID3B	PRELI domain containing protein 3B OS=Homo sapiens OX=9606 GN=PRELID3B PE=1 SV=2	12.6522	13.3901	0.737922	0.000397137	0.0119438	12.569	12.6219	12.7658	13.4069	13.3263	13.4372	Up
Q8NE00	TMEM104	Transmembrane protein 104 OS=Homo sapiens OX=9606 GN=TMEM104 PE=1 SV=2	13.4373	13.888	0.450718	0.000397695	0.0119438	13.379	13.4995	13.4335	13.8588	13.8741	13.9312	Up
Q86SQ4	ADGRG6	Adhesion G-protein coupled receptor G6 OS=Homo sapiens OX=9606 GN=ADGRG6 PE=1 SV=3	14.418	14.8284	0.410348	0.000399833	0.0119438	14.4863	14.3681	14.3996	14.8161	14.8151	14.854	Up
P05161	ISG15	Ubiquitin-like protein ISG15 OS=Homo sapiens OX=9606 GN=ISG15 PE=1 SV=5	15.2078	15.8174	0.60965	0.000407054	0.0121111	15.2998	15.1469	15.1765	15.821	15.8691	15.7622	Up
Q6ZV89	SH2D5	SH2 domain-containing protein 5 OS=Homo sapiens OX=9606 GN=SH2D5 PE=1 SV=2	10.1941	11.1079	0.913802	0.000413874	0.0122265	10.2312	10.0438	10.3073	11.057	11.1007	11.166	Up
Q8NC42	RNF149	E3 ubiquitin-protein ligase RNF149 OS=Homo sapiens OX=9606 GN=RNF149 PE=2 SV=2	12.4187	13.0968	0.678167	0.000414413	0.0122265	12.351	12.4684	12.4366	13.1632	12.9943	13.133	Up
Q9NUN5	LMBRD1	Lysosomal cobalamin transport escort protein LMBD1 OS=Homo sapiens OX=9606 GN=LMBRD1 PE=1 SV=1	12.8828	13.671	0.788194	0.000415846	0.0122265	12.8713	12.8237	12.9536	13.5598	13.678	13.7752	Up
Q13501	SQSTM1	Sequestosome-1 OS=Homo sapiens OX=9606 GN=SQSTM1 PE=1 SV=1	14.6499	16.2274	1.57742	0.000420312	0.0123094	14.3855	14.7426	14.8217	16.1123	16.267	16.3027	Up
Q86T03	PIP4P1	Type 1 phosphatidylinositol 4,5-bisphosphate 4-phosphatase OS=Homo sapiens OX=9606 GN=PIP4P1 PE=1 SV=1	13.9369	14.2904	0.353435	0.000428583	0.0124539	13.9852	13.8813	13.9444	14.2846	14.2711	14.3155	Up
Q8NAN2	MIGA1	Mitoguardin 1 OS=Homo sapiens OX=9606 GN=MIGA1 PE=1 SV=1	13.1946	13.5429	0.348372	0.000434295	0.0124991	13.1859	13.207	13.1908	13.5724	13.4791	13.5774	Up
O14745	NHERF1	Na(+)/H(+) exchange regulatory cofactor NHE-RF1 OS=Homo sapiens OX=9606 GN=NHERF1 PE=1 SV=4	16.5195	16.2429	-0.276651	0.000434478	0.0124991	16.517	16.5465	16.495	16.2807	16.2076	16.2402	Down
Q14534	SQLE	Squalene monooxygenase OS=Homo sapiens OX=9606 GN=SQLE PE=1 SV=3	15.5251	16.3033	0.778276	0.000435901	0.0124991	15.4057	15.5758	15.5937	16.3847	16.2773	16.248	Up
Q96KC8	DNAJC1	DnaJ homolog subfamily C member 1 OS=Homo sapiens OX=9606 GN=DNAJC1 PE=1 SV=1	14.6335	15.0001	0.366639	0.000436832	0.0124991	14.5766	14.6509	14.6729	15.0205	15.0161	14.9637	Up
Q6ZSZ5	ARHGEF18	Rho guanine nucleotide exchange factor 18 OS=Homo sapiens OX=9606 GN=ARHGEF18 PE=1 SV=4	16.0479	16.3219	0.274051	0.000442317	0.012604	16.0087	16.0678	16.0671	16.3534	16.3162	16.2962	Up
Q6UX65	DRAM2	DNA damage-regulated autophagy modulator protein 2 OS=Homo sapiens OX=9606 GN=DRAM2 PE=1 SV=1	11.6972	12.0556	0.358396	0.000446395	0.012604	11.7331	11.6975	11.661	12.1085	12.0242	12.0341	Up
Q96PK6	RBM14	RNA-binding protein 14 OS=Homo sapiens OX=9606 GN=RBM14 PE=1 SV=2	17.4221	17.1422	-0.279861	0.000447249	0.012604	17.3956	17.4599	17.4108	17.1452	17.1716	17.1099	Down
P05120	SERPINB2	Plasminogen activator inhibitor 2 OS=Homo sapiens OX=9606 GN=SERPINB2 PE=1 SV=2	11.3303	12.7232	1.39284	0.000451711	0.0126819	11.2466	11.2279	11.5165	12.6991	12.5756	12.8949	Up
Q9NX62	BPNT2	Golgi-resident adenosine 3',5'-bisphosphate 3'-phosphatase OS=Homo sapiens OX=9606 GN=BPNT2 PE=1 SV=1	15.1849	14.5825	-0.602324	0.000466636	0.0128138	15.276	15.1098	15.1687	14.6405	14.5372	14.5699	Down
P23458	JAK1	Tyrosine-protein kinase JAK1 OS=Homo sapiens OX=9606 GN=JAK1 PE=1 SV=2	14.8162	15.3598	0.543557	0.000466706	0.0128138	14.729	14.8172	14.9025	15.3357	15.362	15.3817	Up
O75712	GJB3	Gap junction beta-3 protein OS=Homo sapiens OX=9606 GN=GJB3 PE=1 SV=1	12.1301	12.9711	0.841056	0.000495381	0.013404	11.9866	12.2574	12.1463	12.987	12.929	12.9973	Up
Q8WUX1	SLC38A5	Sodium-coupled neutral amino acid transporter 5 OS=Homo sapiens OX=9606 GN=SLC38A5 PE=1 SV=1	13.6321	14.3177	0.6856	0.000515524	0.0137343	13.5091	13.6712	13.7158	14.3591	14.316	14.2779	Up
P31431	SDC4	Syndecan-4 OS=Homo sapiens OX=9606 GN=SDC4 PE=1 SV=2	15.0714	15.7447	0.673392	0.000518622	0.0137343	14.9544	15.175	15.0846	15.728	15.7298	15.7764	Up
Q8NFJ5	GPRC5A	Retinoic acid-induced protein 3 OS=Homo sapiens OX=9606 GN=GPRC5A PE=1 SV=2	15.7215	16.2824	0.560838	0.000528691	0.0138958	15.623	15.7733	15.7683	16.2907	16.3207	16.2357	Up
Q9Y5Z0	BACE2	Beta-secretase 2 OS=Homo sapiens OX=9606 GN=BACE2 PE=1 SV=1	12.7118	13.2811	0.569329	0.000541399	0.0139497	12.626	12.7622	12.7471	13.2134	13.2919	13.3379	Up
Q6DKK2	TTC19	Tetratricopeptide repeat protein 19, mitochondrial OS=Homo sapiens OX=9606 GN=TTC19 PE=1 SV=4	15.6396	15.109	-0.530546	0.000544712	0.0139497	15.723	15.602	15.5936	15.0838	15.0708	15.1725	Down
O95361	TRIM16	Tripartite motif-containing protein 16 OS=Homo sapiens OX=9606 GN=TRIM16 PE=1 SV=3	16.9	16.4996	-0.40039	0.000562761	0.0142276	16.85	16.9779	16.8722	16.486	16.5045	16.5084	Down
P04035	HMGCR	3-hydroxy-3-methylglutaryl-coenzyme A reductase OS=Homo sapiens OX=9606 GN=HMGCR PE=1 SV=1	15.4829	16.4645	0.981664	0.000563924	0.0142276	15.3014	15.592	15.5551	16.5364	16.4363	16.4209	Up
Q16134	ETFDH	Electron transfer flavoprotein-ubiquinone oxidoreductase, mitochondrial OS=Homo sapiens OX=9606 GN=ETFDH PE=1 SV=2	15.4187	15.1033	-0.315387	0.000574075	0.014411	15.4423	15.3868	15.4269	15.1574	15.0759	15.0766	Down
Q9NUP7	TRMT13	tRNA:m(4)X modification enzyme TRM13 homolog OS=Homo sapiens OX=9606 GN=TRMT13 PE=1 SV=2	13.7291	14.1956	0.466484	0.000583544	0.0144895	13.7337	13.7726	13.681	14.2022	14.125	14.2594	Up
P35610	SOAT1	Sterol O-acyltransferase 1 OS=Homo sapiens OX=9606 GN=SOAT1 PE=1 SV=3	14.7356	15.0873	0.351704	0.000584815	0.0144895	14.6812	14.7769	14.7487	15.0456	15.1161	15.1002	Up
P04792	HSPB1	Heat shock protein beta-1 OS=Homo sapiens OX=9606 GN=HSPB1 PE=1 SV=2	18.1434	17.6016	-0.54183	0.000587882	0.0144895	18.2167	18.1296	18.084	17.6551	17.6231	17.5266	Down
Q14157	UBAP2L	Ubiquitin-associated protein 2-like OS=Homo sapiens OX=9606 GN=UBAP2L PE=1 SV=2	17.1563	16.6295	-0.526809	0.000604686	0.0147677	17.0743	17.1961	17.1984	16.6918	16.6247	16.572	Down
Q8WUR7	C15orf40	UPF0235 protein C15orf40 OS=Homo sapiens OX=9606 GN=C15orf40 PE=1 SV=2	14.5124	14.1958	-0.316529	0.000618175	0.0147677	14.511	14.5447	14.4814	14.2428	14.1947	14.15	Down
Q01628	IFITM3	Interferon-induced transmembrane protein 3 OS=Homo sapiens OX=9606 GN=IFITM3 PE=1 SV=2	14.071	15.2018	1.13074	0.000619871	0.0147677	14.1882	14.0625	13.9624	15.3168	15.2771	15.0115	Up
Q9H4G0	EPB41L1	Band 4.1-like protein 1 OS=Homo sapiens OX=9606 GN=EPB41L1 PE=1 SV=2	17.3937	16.9133	-0.480349	0.000620922	0.0147677	17.4535	17.357	17.3705	16.9732	16.9266	16.8402	Down
O15091	PRORP	Mitochondrial ribonuclease P catalytic subunit OS=Homo sapiens OX=9606 GN=PRORP PE=1 SV=2	14.7093	14.4425	-0.266721	0.000651604	0.015245	14.6563	14.7247	14.7467	14.4359	14.4388	14.4529	Down
Q9NRV9	HEBP1	Heme-binding protein 1 OS=Homo sapiens OX=9606 GN=HEBP1 PE=1 SV=1	16.152	15.7994	-0.352543	0.000653313	0.015245	16.1724	16.1358	16.1477	15.8431	15.8251	15.7302	Down
Q92887	ABCC2	ATP-binding cassette sub-family C member 2 OS=Homo sapiens OX=9606 GN=ABCC2 PE=1 SV=3	12.3274	12.7514	0.423949	0.00065528	0.015245	12.3046	12.3241	12.3535	12.6969	12.7237	12.8334	Up
Q6NVV3	NIPAL1	Magnesium transporter NIPA3 OS=Homo sapiens OX=9606 GN=NIPAL1 PE=2 SV=1	12.2281	12.9076	0.679464	0.00069021	0.0158563	12.0951	12.2667	12.3225	12.8984	12.9482	12.8762	Up
P08581	MET	Hepatocyte growth factor receptor OS=Homo sapiens OX=9606 GN=MET PE=1 SV=4	15.0833	15.4988	0.415482	0.0006935	0.0158563	15.1544	15.0045	15.091	15.497	15.4893	15.51	Up
Q9HAU4	SMURF2	E3 ubiquitin-protein ligase SMURF2 OS=Homo sapiens OX=9606 GN=SMURF2 PE=1 SV=1	14.0304	14.3033	0.272938	0.000698374	0.0158563	14.0122	14.0629	14.016	14.3335	14.2563	14.3202	Up
Q5T2T1	MPP7	MAGUK p55 subfamily member 7 OS=Homo sapiens OX=9606 GN=MPP7 PE=1 SV=1	15.0894	14.5798	-0.509633	0.000702227	0.0158563	15.188	15.0616	15.0186	14.5459	14.608	14.5854	Down
Q9NPR9	GPR108	Protein GPR108 OS=Homo sapiens OX=9606 GN=GPR108 PE=1 SV=3	13.4355	13.849	0.413531	0.000719106	0.0161755	13.4201	13.4968	13.3896	13.843	13.9045	13.7996	Up
Q68CZ2	TNS3	Tensin-3 OS=Homo sapiens OX=9606 GN=TNS3 PE=1 SV=2	16.5466	16.1585	-0.388114	0.000731189	0.0163489	16.4871	16.6003	16.5525	16.1977	16.1672	16.1107	Down
Q96PY5	FMNL2	Formin-like protein 2 OS=Homo sapiens OX=9606 GN=FMNL2 PE=1 SV=3	16.0384	16.3152	0.276725	0.000766609	0.0170388	16.0798	16.0324	16.0031	16.3429	16.3262	16.2764	Up
Q5T0N5	FNBP1L	Formin-binding protein 1-like OS=Homo sapiens OX=9606 GN=FNBP1L PE=1 SV=3	16.0359	15.7028	-0.333109	0.000780268	0.0172398	16.0371	16.0628	16.0076	15.7634	15.693	15.6518	Down
Q5VVJ2	MYSM1	Deubiquitinase MYSM1 OS=Homo sapiens OX=9606 GN=MYSM1 PE=1 SV=1	13.3875	13.122	-0.265535	0.000793226	0.0173719	13.3721	13.3962	13.3942	13.0987	13.0895	13.1777	Down
Q8TDS4	HCAR2	Hydroxycarboxylic acid receptor 2 OS=Homo sapiens OX=9606 GN=HCAR2 PE=1 SV=1	12.3973	11.3735	-1.02379	0.000802174	0.0174654	12.5822	12.2357	12.3742	11.4469	11.3948	11.2789	Down
Q9BQI0	AIF1L	Allograft inflammatory factor 1-like OS=Homo sapiens OX=9606 GN=AIF1L PE=1 SV=1	14.4202	14.1436	-0.276653	0.000808438	0.0175303	14.3976	14.4636	14.3995	14.1823	14.1394	14.1089	Down
Q6NUT3	MFSD12	Major facilitator superfamily domain-containing protein 12 OS=Homo sapiens OX=9606 GN=MFSD12 PE=1 SV=2	12.3894	12.8927	0.503346	0.000811194	0.0175303	12.3107	12.4034	12.454	12.958	12.8866	12.8334	Up
Q8N1W1	ARHGEF28	Rho guanine nucleotide exchange factor 28 OS=Homo sapiens OX=9606 GN=ARHGEF28 PE=1 SV=3	14.3822	14.8157	0.433491	0.000812194	0.0175303	14.4578	14.3322	14.3566	14.8653	14.8143	14.7675	Up
Q7Z3T8	ZFYVE16	Zinc finger FYVE domain-containing protein 16 OS=Homo sapiens OX=9606 GN=ZFYVE16 PE=1 SV=3	14.8284	14.4901	-0.338244	0.000822918	0.0175409	14.7665	14.8954	14.8232	14.4866	14.491	14.4928	Down
Q69YL0	NCBP2AS2	Protein NCBP2AS2 OS=Homo sapiens OX=9606 GN=NCBP2AS2 PE=1 SV=1	13.1596	13.4324	0.272829	0.000823038	0.0175409	13.1564	13.1812	13.1411	13.4792	13.4349	13.3831	Up
Q9H8T0	AKTIP	AKT-interacting protein OS=Homo sapiens OX=9606 GN=AKTIP PE=1 SV=1	15.762	15.3273	-0.434714	0.000841214	0.0177944	15.8281	15.7474	15.7105	15.36	15.3616	15.2602	Down
Q6P9G4	TMEM154	Transmembrane protein 154 OS=Homo sapiens OX=9606 GN=TMEM154 PE=1 SV=2	12.4605	13.1831	0.722599	0.000843492	0.0177944	12.4964	12.3673	12.5178	13.12	13.3133	13.1161	Up
P25116	F2R	Proteinase-activated receptor 1 OS=Homo sapiens OX=9606 GN=F2R PE=1 SV=2	11.3803	12.6341	1.25382	0.000848244	0.0178442	11.167	11.3374	11.6366	12.5845	12.665	12.6529	Up
P29966	MARCKS	Myristoylated alanine-rich C-kinase substrate OS=Homo sapiens OX=9606 GN=MARCKS PE=1 SV=4	16.9659	16.6878	-0.2781	0.000872096	0.0180636	16.9639	16.9805	16.9534	16.7176	16.7184	16.6275	Down
P09914	IFIT1	Interferon-induced protein with tetratricopeptide repeats 1 OS=Homo sapiens OX=9606 GN=IFIT1 PE=1 SV=2	14.3212	15.1486	0.827382	0.00087276	0.0180636	14.4857	14.188	14.2901	15.2095	15.1299	15.1065	Up
P37802	TAGLN2	Transgelin-2 OS=Homo sapiens OX=9606 GN=TAGLN2 PE=1 SV=3	18.9557	18.6225	-0.333213	0.000875607	0.0180636	18.9926	18.9573	18.9171	18.5931	18.6832	18.5912	Down
Q13277	STX3	Syntaxin-3 OS=Homo sapiens OX=9606 GN=STX3 PE=1 SV=3	14.6982	15.0762	0.37801	0.000929315	0.0186062	14.6291	14.6914	14.774	15.0891	15.0573	15.0822	Up
P09601	HMOX1	Heme oxygenase 1 OS=Homo sapiens OX=9606 GN=HMOX1 PE=1 SV=1	13.4335	13.8535	0.420029	0.000940893	0.0187028	13.4016	13.4393	13.4596	13.7768	13.8515	13.9323	Up
P09913	IFIT2	Interferon-induced protein with tetratricopeptide repeats 2 OS=Homo sapiens OX=9606 GN=IFIT2 PE=1 SV=1	14.4729	15.3195	0.846603	0.00094165	0.0187028	14.6567	14.3361	14.4259	15.3283	15.3416	15.2886	Up
P10588	NR2F6	Nuclear receptor subfamily 2 group F member 6 OS=Homo sapiens OX=9606 GN=NR2F6 PE=1 SV=2	15.2161	14.8169	-0.399263	0.000954682	0.0187212	15.2108	15.2395	15.1982	14.8873	14.8278	14.7355	Down
P08195	SLC3A2	4F2 cell-surface antigen heavy chain OS=Homo sapiens OX=9606 GN=SLC3A2 PE=1 SV=3	18.8878	18.6052	-0.282669	0.000961979	0.0187212	18.9443	18.8772	18.842	18.6196	18.6157	18.5802	Down
Q9NZQ7	CD274	Programmed cell death 1 ligand 1 OS=Homo sapiens OX=9606 GN=CD274 PE=1 SV=1	12.2854	13.3	1.01459	0.000963923	0.0187212	12.2068	12.3808	12.2685	13.1176	13.3011	13.4813	Up
Q9Y320	TMX2	Thioredoxin-related transmembrane protein 2 OS=Homo sapiens OX=9606 GN=TMX2 PE=1 SV=1	15.0765	15.5709	0.494374	0.000969132	0.0187212	14.9998	15.1878	15.042	15.5713	15.5708	15.5707	Up
O76027	ANXA9	Annexin A9 OS=Homo sapiens OX=9606 GN=ANXA9 PE=1 SV=3	15.1902	14.6588	-0.531455	0.000979326	0.0188369	15.302	15.1273	15.1415	14.6955	14.6701	14.6108	Down
P48723	HSPA13	Heat shock 70 kDa protein 13 OS=Homo sapiens OX=9606 GN=HSPA13 PE=1 SV=1	14.2054	14.5801	0.374726	0.000984215	0.0188369	14.1839	14.2748	14.1575	14.5445	14.5681	14.6278	Up
Q16787	LAMA3	Laminin subunit alpha-3 OS=Homo sapiens OX=9606 GN=LAMA3 PE=1 SV=3	13.3407	14.2038	0.863093	0.000985749	0.0188369	13.2544	13.2787	13.4888	14.1459	14.1288	14.3366	Up
P48751	SLC4A3	Anion exchange protein 3 OS=Homo sapiens OX=9606 GN=SLC4A3 PE=1 SV=2	13.3077	12.268	-1.03968	0.000988758	0.0188369	13.3962	13.3848	13.1421	12.3552	12.3555	12.0933	Down
P09038	FGF2	Fibroblast growth factor 2 OS=Homo sapiens OX=9606 GN=FGF2 PE=1 SV=3	12.5671	13.1384	0.571229	0.0010227	0.019142	12.666	12.5397	12.4956	13.2009	13.0561	13.1581	Up
P60520	GABARAPL2	Gamma-aminobutyric acid receptor-associated protein-like 2 OS=Homo sapiens OX=9606 GN=GABARAPL2 PE=1 SV=1	14.8157	15.4465	0.630838	0.00104308	0.0193333	14.6703	14.8783	14.8984	15.4604	15.4202	15.4589	Up
Q8TCD1	C18orf32	UPF0729 protein C18orf32 OS=Homo sapiens OX=9606 GN=C18orf32 PE=1 SV=1	14.0259	14.4469	0.42107	0.00105831	0.0194929	13.9307	14.0916	14.0553	14.4498	14.4292	14.4618	Up
Q9NWD8	TMEM248	Transmembrane protein 248 OS=Homo sapiens OX=9606 GN=TMEM248 PE=1 SV=1	11.2973	12.1	0.802776	0.00106508	0.0194929	11.2238	11.2575	11.4104	12.0743	11.9842	12.2416	Up
Q8N335	GPD1L	Glycerol-3-phosphate dehydrogenase 1-like protein OS=Homo sapiens OX=9606 GN=GPD1L PE=1 SV=1	15.367	15.0336	-0.333444	0.00106765	0.0194929	15.4377	15.3328	15.3306	15.0579	15.0431	14.9998	Down
Q00653	NFKB2	Nuclear factor NF-kappa-B p100 subunit OS=Homo sapiens OX=9606 GN=NFKB2 PE=1 SV=4	16.2727	16.6556	0.382814	0.00106847	0.0194929	16.3371	16.2253	16.2558	16.5947	16.6909	16.6811	Up
O60675	MAFK	Transcription factor MafK OS=Homo sapiens OX=9606 GN=MAFK PE=1 SV=1	13.0875	13.5353	0.447744	0.00107279	0.0194929	13.0002	13.1201	13.1423	13.4885	13.5891	13.5283	Up
P36894	BMPR1A	Bone morphogenetic protein receptor type-1A OS=Homo sapiens OX=9606 GN=BMPR1A PE=1 SV=2	11.7909	12.4771	0.686225	0.00108152	0.0195833	11.6408	11.8504	11.8815	12.4302	12.4679	12.5332	Up
O00391	QSOX1	Sulfhydryl oxidase 1 OS=Homo sapiens OX=9606 GN=QSOX1 PE=1 SV=3	12.7949	13.3508	0.555991	0.00108301	0.0195833	12.6678	12.8767	12.84	13.3788	13.3413	13.3324	Up
Q9NRD1	FBXO6	F-box only protein 6 OS=Homo sapiens OX=9606 GN=FBXO6 PE=1 SV=1	14.2792	13.958	-0.321221	0.00109535	0.0196374	14.3301	14.2092	14.2983	13.9344	13.9644	13.9752	Down
Q9Y597	KCTD3	BTB/POZ domain-containing protein KCTD3 OS=Homo sapiens OX=9606 GN=KCTD3 PE=1 SV=2	16.9154	16.551	-0.364353	0.00113314	0.0199153	16.8699	16.9214	16.9548	16.5749	16.5981	16.4801	Down
Q5T9L3	WLS	Protein wntless homolog OS=Homo sapiens OX=9606 GN=WLS PE=1 SV=2	15.0489	14.6729	-0.375988	0.00114113	0.0199609	15.0241	15.0463	15.0764	14.7577	14.6229	14.6383	Down
Q13451	FKBP5	Peptidyl-prolyl cis-trans isomerase FKBP5 OS=Homo sapiens OX=9606 GN=FKBP5 PE=1 SV=2	16.374	16.0131	-0.36085	0.00114131	0.0199609	16.4105	16.3531	16.3584	15.9506	16.0857	16.0031	Down
L0R6Q1	SLC35A4	SLC35A4 upstream open reading frame protein OS=Homo sapiens OX=9606 GN=SLC35A4 PE=3 SV=1	14.3151	14.5782	0.26302	0.00115261	0.0199752	14.2771	14.3155	14.3529	14.6226	14.5657	14.5462	Up
Q96T21	SECISBP2	Selenocysteine insertion sequence-binding protein 2 OS=Homo sapiens OX=9606 GN=SECISBP2 PE=1 SV=2	11.7984	12.1834	0.385066	0.00116038	0.020013	11.7283	11.8848	11.782	12.1948	12.1697	12.1858	Up
Q96LD4	TRIM47	E3 ubiquitin-protein ligase TRIM47 OS=Homo sapiens OX=9606 GN=TRIM47 PE=1 SV=2	13.7706	14.1364	0.365769	0.00117091	0.0200326	13.8063	13.6991	13.8064	14.1884	14.1065	14.1142	Up
O14763	TNFRSF10B	Tumor necrosis factor receptor superfamily member 10B OS=Homo sapiens OX=9606 GN=TNFRSF10B PE=1 SV=2	13.0162	13.936	0.919762	0.00119718	0.0203133	12.8851	13.0143	13.1492	13.8143	14.092	13.9017	Up
P13928	ANXA8	Annexin A8 OS=Homo sapiens OX=9606 GN=ANXA8 PE=1 SV=3	18.0427	17.7488	-0.293906	0.00119954	0.0203133	18.1048	18.0126	18.0107	17.7843	17.7289	17.7332	Down
Q99808	SLC29A1	Equilibrative nucleoside transporter 1 OS=Homo sapiens OX=9606 GN=SLC29A1 PE=1 SV=3	15.188	15.5063	0.318229	0.00121628	0.0204314	15.1189	15.232	15.2132	15.5195	15.4725	15.5267	Up
Q01201	RELB	Transcription factor RelB OS=Homo sapiens OX=9606 GN=RELB PE=1 SV=2	12.2602	12.9936	0.733348	0.00121746	0.0204314	12.2692	12.1048	12.4068	13.0276	12.9964	12.9567	Up
P78524	DENND2B	DENN domain-containing protein 2B OS=Homo sapiens OX=9606 GN=DENND2B PE=1 SV=3	13.0223	12.6421	-0.380202	0.00122064	0.0204389	13.0651	13.0223	12.9796	12.5804	12.7155	12.6305	Down
Q8N3F8	MICALL1	MICAL-like protein 1 OS=Homo sapiens OX=9606 GN=MICALL1 PE=1 SV=2	16.6884	16.3636	-0.324809	0.00123652	0.0205207	16.7565	16.657	16.6517	16.3884	16.38	16.3224	Down
Q9C0H2	TTYH3	Protein tweety homolog 3 OS=Homo sapiens OX=9606 GN=TTYH3 PE=1 SV=3	14.1797	14.856	0.676251	0.00124991	0.0205972	14.0342	14.2991	14.2059	14.916	14.8323	14.8196	Up
Q9H098	FAM107B	Protein FAM107B OS=Homo sapiens OX=9606 GN=FAM107B PE=1 SV=1	15.1127	15.4447	0.331947	0.00125269	0.0205972	15.1536	15.0324	15.1522	15.456	15.43	15.4481	Up
P12277	CKB	Creatine kinase B-type OS=Homo sapiens OX=9606 GN=CKB PE=1 SV=1	14.9297	14.5769	-0.352754	0.00125781	0.0205972	14.8762	14.91	15.0028	14.6083	14.5866	14.5358	Down
P32121	ARRB2	Beta-arrestin-2 OS=Homo sapiens OX=9606 GN=ARRB2 PE=1 SV=2	13.6223	13.2743	-0.347955	0.00126043	0.0205972	13.6331	13.6905	13.5432	13.2697	13.2785	13.2748	Down
O00622	CCN1	CCN family member 1 OS=Homo sapiens OX=9606 GN=CCN1 PE=1 SV=1	15.9314	17.0029	1.07145	0.00127442	0.0207398	15.7106	15.9444	16.1394	16.9194	17.0825	17.0067	Up
Q86V15	CASZ1	Zinc finger protein castor homolog 1 OS=Homo sapiens OX=9606 GN=CASZ1 PE=1 SV=4	11.5573	11.1567	-0.400572	0.00132475	0.0211884	11.5244	11.5862	11.5614	11.2385	11.0765	11.1553	Down
P56749	CLDN12	Claudin-12 OS=Homo sapiens OX=9606 GN=CLDN12 PE=1 SV=1	12.6719	13.24	0.568085	0.00133359	0.021197	12.5829	12.7857	12.6472	13.2137	13.1906	13.3158	Up
Q9BYX4	IFIH1	Interferon-induced helicase C domain-containing protein 1 OS=Homo sapiens OX=9606 GN=IFIH1 PE=1 SV=3	12.0258	12.4646	0.438782	0.00134323	0.021206	12.1082	12.021	11.9481	12.4696	12.5135	12.4105	Up
O76070	SNCG	Gamma-synuclein OS=Homo sapiens OX=9606 GN=SNCG PE=1 SV=2	16.9009	16.2808	-0.620168	0.0013488	0.021206	17.0425	16.8368	16.8234	16.3106	16.3154	16.2162	Down
P29373	CRABP2	Cellular retinoic acid-binding protein 2 OS=Homo sapiens OX=9606 GN=CRABP2 PE=1 SV=2	15.5099	14.9605	-0.549457	0.0013591	0.0212256	15.6293	15.4383	15.4622	14.9131	15.0269	14.9414	Down
P18146	EGR1	Early growth response protein 1 OS=Homo sapiens OX=9606 GN=EGR1 PE=1 SV=1	11.6998	10.7871	-0.912738	0.00136315	0.0212256	11.6056	11.5666	11.9273	10.7847	10.8097	10.7669	Down
Q9Y6A9	SPCS1	Signal peptidase complex subunit 1 OS=Homo sapiens OX=9606 GN=SPCS1 PE=1 SV=5	13.9771	14.3138	0.336676	0.00136561	0.0212256	14.0087	13.9933	13.9294	14.3464	14.3507	14.2442	Up
P48735	IDH2	Isocitrate dehydrogenase [NADP], mitochondrial OS=Homo sapiens OX=9606 GN=IDH2 PE=1 SV=2	17.375	17.0273	-0.347702	0.00140973	0.021506	17.4588	17.3327	17.3333	17.045	17.0369	16.9999	Down
Q9H2D1	SLC25A32	Mitochondrial folate transporter/carrier OS=Homo sapiens OX=9606 GN=SLC25A32 PE=1 SV=2	12.2258	12.7341	0.508303	0.00141295	0.021506	12.1381	12.2492	12.29	12.8251	12.6771	12.6999	Up
Q13907	IDI1	Isopentenyl-diphosphate Delta-isomerase 1 OS=Homo sapiens OX=9606 GN=IDI1 PE=1 SV=2	16.3326	16.6032	0.270631	0.00141972	0.021506	16.294	16.3935	16.3103	16.6161	16.6211	16.5726	Up
Q6NYC8	PPP1R18	Phostensin OS=Homo sapiens OX=9606 GN=PPP1R18 PE=1 SV=1	15.4566	15.724	0.267419	0.00144778	0.0217183	15.4615	15.4977	15.4106	15.6931	15.7099	15.7691	Up
Q9BWM7	SFXN3	Sideroflexin-3 OS=Homo sapiens OX=9606 GN=SFXN3 PE=1 SV=3	14.9038	15.2187	0.314983	0.00144827	0.0217183	14.9723	14.8842	14.8548	15.2187	15.1851	15.2525	Up
Q5T4F4	ZFYVE27	Protrudin OS=Homo sapiens OX=9606 GN=ZFYVE27 PE=1 SV=1	11.7714	12.0663	0.294881	0.00145358	0.0217228	11.7214	11.8104	11.7824	12.0856	12.0127	12.1005	Up
O14545	TRAFD1	TRAF-type zinc finger domain-containing protein 1 OS=Homo sapiens OX=9606 GN=TRAFD1 PE=1 SV=1	15.7703	15.3752	-0.3951	0.00146807	0.0218397	15.7352	15.7951	15.7807	15.4077	15.4362	15.2818	Down
Q9NWU1	OXSM	3-oxoacyl-[acyl-carrier-protein] synthase, mitochondrial OS=Homo sapiens OX=9606 GN=OXSM PE=1 SV=1	13.7291	13.2633	-0.46573	0.00150376	0.0220808	13.8106	13.6681	13.7084	13.2897	13.3205	13.1798	Down
O95049	TJP3	Tight junction protein ZO-3 OS=Homo sapiens OX=9606 GN=TJP3 PE=1 SV=3	14.7412	14.2506	-0.490516	0.00150791	0.0220808	14.8664	14.6645	14.6925	14.2627	14.2426	14.2466	Down
Q8TED9	AFAP1L1	Actin filament-associated protein 1-like 1 OS=Homo sapiens OX=9606 GN=AFAP1L1 PE=1 SV=2	11.9716	12.4811	0.509452	0.0015178	0.0220859	11.9776	11.9838	11.9534	12.3506	12.539	12.5536	Up
Q8WU79	SMAP2	Stromal membrane-associated protein 2 OS=Homo sapiens OX=9606 GN=SMAP2 PE=1 SV=1	14.4026	13.9003	-0.502324	0.00153545	0.0221366	14.4572	14.4074	14.3431	14.0004	13.8948	13.8055	Down
P16035	TIMP2	Metalloproteinase inhibitor 2 OS=Homo sapiens OX=9606 GN=TIMP2 PE=1 SV=2	13.3202	13.7762	0.45596	0.00154148	0.0221806	13.3853	13.3497	13.2257	13.7594	13.7269	13.8423	Up
P46734	MAP2K3	Dual specificity mitogen-activated protein kinase kinase 3 OS=Homo sapiens OX=9606 GN=MAP2K3 PE=1 SV=2	14.7071	15.1439	0.436776	0.00155059	0.0221857	14.733	14.779	14.6094	15.1079	15.1944	15.1294	Up
Q8IZN3	ZDHHC14	Palmitoyltransferase ZDHHC14 OS=Homo sapiens OX=9606 GN=ZDHHC14 PE=1 SV=1	11.4969	12.3291	0.832141	0.00157887	0.0225449	11.5839	11.2841	11.6227	12.3455	12.2881	12.3537	Up
Q9H2H9	SLC38A1	Sodium-coupled neutral amino acid symporter 1 OS=Homo sapiens OX=9606 GN=SLC38A1 PE=1 SV=1	15.8688	16.222	0.353263	0.00161551	0.0228497	15.9581	15.8162	15.832	16.2437	16.2011	16.2213	Up
O95466	FMNL1	Formin-like protein 1 OS=Homo sapiens OX=9606 GN=FMNL1 PE=1 SV=3	13.671	14.0975	0.426448	0.00163383	0.0229999	13.7084	13.6466	13.6581	13.9936	14.1308	14.168	Up
P34896	SHMT1	Serine hydroxymethyltransferase, cytosolic OS=Homo sapiens OX=9606 GN=SHMT1 PE=1 SV=1	16.6781	16.3944	-0.28368	0.00165176	0.0231339	16.7421	16.6498	16.6425	16.4258	16.3992	16.3583	Down
Q13753	LAMC2	Laminin subunit gamma-2 OS=Homo sapiens OX=9606 GN=LAMC2 PE=1 SV=2	14.27	14.9748	0.704789	0.00167301	0.0232664	14.1163	14.3604	14.3334	14.8899	14.9622	15.0724	Up
Q07352	ZFP36L1	mRNA decay activator protein ZFP36L1 OS=Homo sapiens OX=9606 GN=ZFP36L1 PE=1 SV=1	14.053	14.3905	0.337489	0.00167718	0.023281	13.9819	14.1005	14.0766	14.4433	14.3593	14.3689	Up
Q96KA5	CLPTM1L	Lipid scramblase CLPTM1L OS=Homo sapiens OX=9606 GN=CLPTM1L PE=1 SV=1	14.9597	15.2767	0.316947	0.00168251	0.0233116	14.9067	15.0042	14.9683	15.3191	15.295	15.2159	Up
Q9H9Y2	RPF1	Ribosome production factor 1 OS=Homo sapiens OX=9606 GN=RPF1 PE=1 SV=2	13.586	13.9319	0.345929	0.0016995	0.0234532	13.6267	13.5846	13.5467	13.8558	13.9489	13.9911	Up
P48960	ADGRE5	Adhesion G protein-coupled receptor E5 OS=Homo sapiens OX=9606 GN=ADGRE5 PE=1 SV=4	15.1196	15.4489	0.329298	0.00170109	0.0234532	15.102	15.113	15.1439	15.5181	15.3726	15.456	Up
O95716	RAB3D	Ras-related protein Rab-3D OS=Homo sapiens OX=9606 GN=RAB3D PE=1 SV=1	14.8741	14.5446	-0.329512	0.00170616	0.0234532	14.8183	14.8798	14.9243	14.5019	14.6062	14.5258	Down
Q9P1Z2	CALCOCO1	Calcium-binding and coiled-coil domain-containing protein 1 OS=Homo sapiens OX=9606 GN=CALCOCO1 PE=1 SV=2	12.3505	12.7339	0.383383	0.00170843	0.0234532	12.2622	12.3634	12.4261	12.6966	12.7514	12.7537	Up
P00918	CA2	Carbonic anhydrase 2 OS=Homo sapiens OX=9606 GN=CA2 PE=1 SV=2	15.7065	15.4401	-0.266326	0.00171534	0.0234618	15.7439	15.707	15.6685	15.4037	15.4957	15.4209	Down
Q9NZC7	WWOX	WW domain-containing oxidoreductase OS=Homo sapiens OX=9606 GN=WWOX PE=1 SV=1	11.2423	11.6441	0.40181	0.00173009	0.0235903	11.2679	11.2459	11.2131	11.7364	11.5584	11.6375	Up
P27701	CD82	CD82 antigen OS=Homo sapiens OX=9606 GN=CD82 PE=1 SV=1	14.391	14.7744	0.38337	0.00173105	0.0235903	14.3099	14.4705	14.3927	14.8122	14.7352	14.7757	Up
Q08334	IL10RB	Interleukin-10 receptor subunit beta OS=Homo sapiens OX=9606 GN=IL10RB PE=1 SV=2	11.1698	12.0636	0.893778	0.0017389	0.0236077	11.0821	11.31	11.1174	11.8725	12.1872	12.1312	Up
O95833	CLIC3	Chloride intracellular channel protein 3 OS=Homo sapiens OX=9606 GN=CLIC3 PE=1 SV=2	11.2942	10.8196	-0.474675	0.00173996	0.0236077	11.3476	11.3393	11.1958	10.8749	10.8431	10.7407	Down
Q52LW3	ARHGAP29	Rho GTPase-activating protein 29 OS=Homo sapiens OX=9606 GN=ARHGAP29 PE=1 SV=2	16.1404	16.6659	0.525549	0.00174497	0.0236077	16.0017	16.2213	16.1982	16.6575	16.6894	16.6508	Up
Q15283	RASA2	Ras GTPase-activating protein 2 OS=Homo sapiens OX=9606 GN=RASA2 PE=1 SV=3	13.0734	13.4012	0.327797	0.00177482	0.0239421	13.1403	13.0272	13.0526	13.3481	13.4433	13.4122	Up
Q9HB40	SCPEP1	Retinoid-inducible serine carboxypeptidase OS=Homo sapiens OX=9606 GN=SCPEP1 PE=1 SV=1	17.5044	17.2153	-0.289118	0.00178167	0.0239421	17.5728	17.4924	17.448	17.2389	17.2163	17.1906	Down
Q8TB96	ITFG1	T-cell immunomodulatory protein OS=Homo sapiens OX=9606 GN=ITFG1 PE=1 SV=1	12.1809	12.4583	0.277439	0.0018351	0.024342	12.1727	12.1849	12.1851	12.5273	12.398	12.4497	Up
O75185	ATP2C2	Calcium-transporting ATPase type 2C member 2 OS=Homo sapiens OX=9606 GN=ATP2C2 PE=1 SV=3	11.246	11.6988	0.452864	0.00184577	0.0244401	11.3272	11.2447	11.1659	11.6651	11.6516	11.7797	Up
P13726	F3	Tissue factor OS=Homo sapiens OX=9606 GN=F3 PE=1 SV=1	15.9136	17.0772	1.16355	0.00186116	0.0245568	15.6517	15.9556	16.1336	16.9306	17.1727	17.1282	Up
P29401	TKT	Transketolase OS=Homo sapiens OX=9606 GN=TKT PE=1 SV=3	19.081	18.8118	-0.269185	0.00186492	0.024563	19.1434	19.0538	19.0457	18.8484	18.8047	18.7823	Down
Q5TB80	CEP162	Centrosomal protein of 162 kDa OS=Homo sapiens OX=9606 GN=CEP162 PE=1 SV=2	10.7889	11.0768	0.287878	0.00187336	0.0245874	10.7564	10.8468	10.7636	11.0723	11.033	11.1252	Up
P15104	GLUL	Glutamine synthetase OS=Homo sapiens OX=9606 GN=GLUL PE=1 SV=4	16.0645	14.9831	-1.08149	0.00189529	0.0247016	16.3532	15.9576	15.8828	15.0394	14.9527	14.9571	Down
P13498	CYBA	Cytochrome b-245 light chain OS=Homo sapiens OX=9606 GN=CYBA PE=1 SV=3	12.8229	13.5662	0.743293	0.00190474	0.0247385	12.6558	12.8654	12.9476	13.674	13.5063	13.5184	Up
Q8NBP7	PCSK9	Proprotein convertase subtilisin/kexin type 9 OS=Homo sapiens OX=9606 GN=PCSK9 PE=1 SV=3	12.169	12.6985	0.52945	0.00204688	0.0261289	12.075	12.2862	12.1459	12.6231	12.7092	12.7631	Up
P82970	HMGN5	High mobility group nucleosome-binding domain-containing protein 5 OS=Homo sapiens OX=9606 GN=HMGN5 PE=1 SV=1	14.4835	14.0277	-0.455781	0.00205728	0.0261289	14.5719	14.4542	14.4244	14.088	14.0566	13.9386	Down
Q86VE9	SERINC5	Serine incorporator 5 OS=Homo sapiens OX=9606 GN=SERINC5 PE=2 SV=1	12.5414	13.0353	0.493862	0.00207324	0.026198	12.4181	12.5749	12.6312	12.9845	13.0415	13.0798	Up
O95171	SCEL	Sciellin OS=Homo sapiens OX=9606 GN=SCEL PE=1 SV=2	16.3325	15.8903	-0.442248	0.00212303	0.0264638	16.4141	16.2615	16.3221	15.9603	15.9021	15.8084	Down
Q2TAZ0	ATG2A	Autophagy-related protein 2 homolog A OS=Homo sapiens OX=9606 GN=ATG2A PE=1 SV=3	14.0423	14.3435	0.301159	0.00212762	0.0264638	13.9934	14.0932	14.0405	14.3138	14.4065	14.3102	Up
O14732	IMPA2	Inositol monophosphatase 2 OS=Homo sapiens OX=9606 GN=IMPA2 PE=1 SV=1	13.7668	13.4226	-0.344199	0.00214073	0.0265124	13.7693	13.8376	13.6935	13.4713	13.4117	13.3847	Down
P46821	MAP1B	Microtubule-associated protein 1B OS=Homo sapiens OX=9606 GN=MAP1B PE=1 SV=2	12.6398	13.289	0.649254	0.00216912	0.026731	12.7875	12.6193	12.5124	13.2261	13.2616	13.3793	Up
P04040	CAT	Catalase OS=Homo sapiens OX=9606 GN=CAT PE=1 SV=3	16.8177	16.4829	-0.334758	0.00217706	0.0267846	16.8986	16.7973	16.7573	16.5204	16.4424	16.486	Down
P56559	ARL4C	ADP-ribosylation factor-like protein 4C OS=Homo sapiens OX=9606 GN=ARL4C PE=1 SV=1	11.3415	12.2368	0.895324	0.00220339	0.0269185	11.1858	11.275	11.5636	12.1536	12.2074	12.3494	Up
P15408	FOSL2	Fos-related antigen 2 OS=Homo sapiens OX=9606 GN=FOSL2 PE=1 SV=1	12.1925	12.5519	0.359406	0.00220617	0.0269185	12.1509	12.208	12.2187	12.4705	12.5522	12.6331	Up
Q86VX9	MON1A	Vacuolar fusion protein MON1 homolog A OS=Homo sapiens OX=9606 GN=MON1A PE=1 SV=3	11.5541	11.2777	-0.276448	0.00221095	0.0269185	11.5112	11.5617	11.5895	11.3407	11.2583	11.2341	Down
Q9H201	EPN3	Epsin-3 OS=Homo sapiens OX=9606 GN=EPN3 PE=2 SV=1	10.1569	9.25693	-0.899951	0.00223195	0.0270315	9.92765	10.1751	10.3679	9.29957	9.23701	9.23421	Down
A2RU67	FAM234B	Protein FAM234B OS=Homo sapiens OX=9606 GN=FAM234B PE=1 SV=1	12.2412	12.7051	0.463985	0.00225942	0.0270996	12.1442	12.2163	12.3629	12.7004	12.7386	12.6765	Up
P63302	SELENOW	Selenoprotein W OS=Homo sapiens OX=9606 GN=SELENOW PE=1 SV=3	11.6074	11.1362	-0.471259	0.00226233	0.0270996	11.5321	11.6369	11.6533	11.0679	11.2478	11.0928	Down
Q03181	PPARD	Peroxisome proliferator-activated receptor delta OS=Homo sapiens OX=9606 GN=PPARD PE=1 SV=1	12.2063	12.6422	0.435894	0.00227632	0.0271125	12.3295	12.154	12.1354	12.6613	12.6438	12.6216	Up
Q9UKJ5	CHIC2	Cysteine-rich hydrophobic domain-containing protein 2 OS=Homo sapiens OX=9606 GN=CHIC2 PE=1 SV=1	11.5558	12.2081	0.652274	0.0023668	0.0277042	11.5328	11.5351	11.5994	12.3844	12.1687	12.0711	Up
P23921	RRM1	Ribonucleoside-diphosphate reductase large subunit OS=Homo sapiens OX=9606 GN=RRM1 PE=1 SV=1	17.8932	17.588	-0.305164	0.00237191	0.0277206	17.8195	17.9368	17.9232	17.6345	17.5791	17.5504	Down
Q6UXV4	APOOL	MICOS complex subunit MIC27 OS=Homo sapiens OX=9606 GN=APOOL PE=1 SV=1	13.7989	14.1035	0.304672	0.00238154	0.0277462	13.8787	13.7498	13.7681	14.1404	14.0777	14.0925	Up
Q9H2P0	ADNP	Activity-dependent neuroprotector homeobox protein OS=Homo sapiens OX=9606 GN=ADNP PE=1 SV=1	16.549	16.2817	-0.26729	0.00239864	0.0278152	16.5948	16.5442	16.508	16.2998	16.2232	16.3221	Down
Q9BVG9	PTDSS2	Phosphatidylserine synthase 2 OS=Homo sapiens OX=9606 GN=PTDSS2 PE=1 SV=1	13.2881	12.9937	-0.294364	0.00240658	0.0278209	13.2442	13.3687	13.2513	13.0188	12.9956	12.9666	Down
O43278	SPINT1	Kunitz-type protease inhibitor 1 OS=Homo sapiens OX=9606 GN=SPINT1 PE=1 SV=2	14.1878	14.4916	0.303732	0.00246108	0.0282759	14.197	14.2009	14.1656	14.4466	14.5782	14.4499	Up
Q9NYQ8	FAT2	Protocadherin Fat 2 OS=Homo sapiens OX=9606 GN=FAT2 PE=1 SV=2	16.2836	15.8009	-0.482788	0.002548	0.0290498	16.3279	16.2998	16.2232	15.921	15.7822	15.6994	Down
P54687	BCAT1	Branched-chain-amino-acid aminotransferase, cytosolic OS=Homo sapiens OX=9606 GN=BCAT1 PE=1 SV=3	13.7426	14.163	0.420442	0.00255567	0.0290498	13.8434	13.7085	13.6758	14.0915	14.2025	14.1951	Up
Q96H72	SLC39A13	Zinc transporter ZIP13 OS=Homo sapiens OX=9606 GN=SLC39A13 PE=1 SV=3	12.1568	12.5839	0.427102	0.0026739	0.0295878	12.0432	12.1805	12.2466	12.5798	12.6265	12.5455	Up
Q13555	CAMK2G	Calcium/calmodulin-dependent protein kinase type II subunit gamma OS=Homo sapiens OX=9606 GN=CAMK2G PE=1 SV=4	16.681	16.3865	-0.294475	0.00268567	0.0295878	16.7518	16.6741	16.6169	16.4077	16.4075	16.3443	Down
Q15560	TCEA2	Transcription elongation factor A protein 2 OS=Homo sapiens OX=9606 GN=TCEA2 PE=1 SV=1	13.6431	13.3094	-0.333713	0.00270707	0.0296428	13.7278	13.5667	13.6348	13.3169	13.2732	13.3381	Down
Q16890	TPD52L1	Tumor protein D53 OS=Homo sapiens OX=9606 GN=TPD52L1 PE=1 SV=1	15.728	15.3329	-0.39505	0.00274021	0.0298743	15.8197	15.6862	15.6781	15.3617	15.3804	15.2568	Down
O43678	NDUFA2	NADH dehydrogenase [ubiquinone] 1 alpha subcomplex subunit 2 OS=Homo sapiens OX=9606 GN=NDUFA2 PE=1 SV=3	15.307	15.021	-0.285956	0.00277704	0.0300564	15.3706	15.2942	15.2561	15.0471	15.0501	14.9659	Down
Q15797	SMAD1	Mothers against decapentaplegic homolog 1 OS=Homo sapiens OX=9606 GN=SMAD1 PE=1 SV=1	11.4957	11.1789	-0.316868	0.00278718	0.0300702	11.4532	11.4832	11.5508	11.254	11.1574	11.1252	Down
Q9Y6M5	SLC30A1	Proton-coupled zinc antiporter SLC30A1 OS=Homo sapiens OX=9606 GN=SLC30A1 PE=1 SV=3	14.534	14.9163	0.382285	0.00280212	0.0301048	14.4621	14.5525	14.5874	14.8282	14.9462	14.9745	Up
P23469	PTPRE	Receptor-type tyrosine-protein phosphatase epsilon OS=Homo sapiens OX=9606 GN=PTPRE PE=1 SV=1	13.5926	13.9179	0.325282	0.00281046	0.0301048	13.6323	13.5476	13.5978	13.9462	13.8331	13.9743	Up
P53814	SMTN	Smoothelin OS=Homo sapiens OX=9606 GN=SMTN PE=1 SV=7	13.6527	13.9301	0.277366	0.00288032	0.030511	13.6161	13.6607	13.6813	13.861	13.9368	13.9923	Up
P55085	F2RL1	Proteinase-activated receptor 2 OS=Homo sapiens OX=9606 GN=F2RL1 PE=1 SV=1	14.477	15.4513	0.974301	0.00288515	0.0305189	14.3529	14.5117	14.5663	15.7115	15.3864	15.256	Up
P31321	PRKAR1B	cAMP-dependent protein kinase type I-beta regulatory subunit OS=Homo sapiens OX=9606 GN=PRKAR1B PE=1 SV=4	9.32798	9.71908	0.391103	0.00288946	0.0305212	9.42158	9.33144	9.2309	9.70675	9.76583	9.68466	Up
P30084	ECHS1	Enoyl-CoA hydratase, mitochondrial OS=Homo sapiens OX=9606 GN=ECHS1 PE=1 SV=4	16.7839	16.52	-0.263887	0.00293748	0.0308505	16.8388	16.7534	16.7596	16.5486	16.5517	16.4598	Down
Q8NBZ7	UXS1	UDP-glucuronic acid decarboxylase 1 OS=Homo sapiens OX=9606 GN=UXS1 PE=1 SV=1	13.5617	13.9637	0.402018	0.00294679	0.0308505	13.4554	13.6666	13.5632	13.9871	13.9462	13.9579	Up
Q8NBQ5	HSD17B11	Estradiol 17-beta-dehydrogenase 11 OS=Homo sapiens OX=9606 GN=HSD17B11 PE=1 SV=3	11.6776	12.3892	0.71154	0.0029664	0.0308505	11.5556	11.6375	11.8398	12.4472	12.2482	12.4721	Up
P52926	HMGA2	High mobility group protein HMGI-C OS=Homo sapiens OX=9606 GN=HMGA2 PE=1 SV=1	11.9935	12.51	0.516492	0.00297809	0.0308505	12.083	12.0315	11.8661	12.4592	12.4686	12.6023	Up
Q14517	FAT1	Protocadherin Fat 1 OS=Homo sapiens OX=9606 GN=FAT1 PE=1 SV=2	14.3713	14.8021	0.430749	0.00298631	0.0308505	14.493	14.34	14.281	14.789	14.7725	14.8448	Up
Q8TDW0	LRRC8C	Volume-regulated anion channel subunit LRRC8C OS=Homo sapiens OX=9606 GN=LRRC8C PE=1 SV=2	13.9786	14.3253	0.346652	0.00304217	0.0310728	13.9886	14.0446	13.9027	14.2924	14.2883	14.3952	Up
P21580	TNFAIP3	Tumor necrosis factor alpha-induced protein 3 OS=Homo sapiens OX=9606 GN=TNFAIP3 PE=1 SV=1	11.3887	12.3613	0.972541	0.00306703	0.0310781	11.4941	11.1531	11.519	12.2652	12.2656	12.553	Up
Q9Y5B8	NME7	Nucleoside diphosphate kinase 7 OS=Homo sapiens OX=9606 GN=NME7 PE=1 SV=1	15.2217	15.7395	0.517802	0.00310208	0.0312418	15.0634	15.3187	15.2831	15.723	15.7691	15.7264	Up
Q9H6Y7	RNF167	E3 ubiquitin-protein ligase RNF167 OS=Homo sapiens OX=9606 GN=RNF167 PE=1 SV=1	13.3615	13.7954	0.433876	0.00310696	0.0312418	13.2696	13.3701	13.4449	13.7296	13.8823	13.7744	Up
O43909	EXTL3	Exostosin-like 3 OS=Homo sapiens OX=9606 GN=EXTL3 PE=1 SV=1	13.5359	13.8215	0.285556	0.00315296	0.031479	13.4624	13.5704	13.5749	13.8278	13.8629	13.7738	Up
P50548	ERF	ETS domain-containing transcription factor ERF OS=Homo sapiens OX=9606 GN=ERF PE=1 SV=2	14.106	13.7284	-0.377574	0.0032284	0.0321034	14.1353	14.0974	14.0851	13.8258	13.7339	13.6254	Down
Q8IXQ6	PARP9	Protein mono-ADP-ribosyltransferase PARP9 OS=Homo sapiens OX=9606 GN=PARP9 PE=1 SV=2	15.068	14.7541	-0.313877	0.00329227	0.0323209	15.1488	15.0405	15.0147	14.7979	14.7641	14.7005	Down
Q8N5U6	RNF10	RING finger protein 10 OS=Homo sapiens OX=9606 GN=RNF10 PE=1 SV=2	13.3487	13.7461	0.3974	0.00332533	0.0325047	13.2316	13.3784	13.4359	13.732	13.7239	13.7822	Up
Q9P1U1	ACTR3B	Actin-related protein 3B OS=Homo sapiens OX=9606 GN=ACTR3B PE=2 SV=1	13.3917	13.0212	-0.370415	0.00333953	0.0325158	13.4692	13.3696	13.3362	13.0686	13.0613	12.9338	Down
O95772	STARD3NL	STARD3 N-terminal-like protein OS=Homo sapiens OX=9606 GN=STARD3NL PE=1 SV=1	12.3477	12.7538	0.406075	0.00336301	0.0325979	12.4291	12.2852	12.3288	12.7201	12.6906	12.8507	Up
Q96EX1	SMIM12	Small integral membrane protein 12 OS=Homo sapiens OX=9606 GN=SMIM12 PE=1 SV=3	12.7502	13.1245	0.374316	0.00339916	0.0328395	12.6965	12.8643	12.6899	13.1627	13.1051	13.1058	Up
Q9ULX9	MAFF	Transcription factor MafF OS=Homo sapiens OX=9606 GN=MAFF PE=1 SV=2	11.7224	12.7018	0.979337	0.0034123	0.0329239	11.4484	11.8357	11.8832	12.5636	12.8283	12.7134	Up
Q03405	PLAUR	Urokinase plasminogen activator surface receptor OS=Homo sapiens OX=9606 GN=PLAUR PE=1 SV=1	12.3161	13.46	1.14392	0.00344351	0.0331577	12.1644	12.2345	12.5492	13.1868	13.5321	13.6611	Up
Q8NBM8	PCYOX1L	Prenylcysteine oxidase-like OS=Homo sapiens OX=9606 GN=PCYOX1L PE=1 SV=2	14.0513	13.7118	-0.339462	0.00346572	0.0331577	14.1106	14.0209	14.0224	13.7008	13.7968	13.638	Down
Q9BSL1	UBAC1	Ubiquitin-associated domain-containing protein 1 OS=Homo sapiens OX=9606 GN=UBAC1 PE=1 SV=1	14.688	14.405	-0.282959	0.00348319	0.0332216	14.7519	14.6443	14.6676	14.396	14.4645	14.3544	Down
Q13751	LAMB3	Laminin subunit beta-3 OS=Homo sapiens OX=9606 GN=LAMB3 PE=1 SV=1	15.84	16.2395	0.399493	0.00353838	0.0334913	15.7533	15.8847	15.882	16.1538	16.2436	16.321	Up
Q567V2	MPV17L2	Mpv17-like protein 2 OS=Homo sapiens OX=9606 GN=MPV17L2 PE=1 SV=2	11.3167	11.7612	0.444581	0.0035684	0.0336325	11.1866	11.3567	11.4068	11.7736	11.7072	11.803	Up
Q9H8H3	TMT1A	N6-adenosine-methyltransferase TMT1A OS=Homo sapiens OX=9606 GN=TMT1A PE=1 SV=1	12.1369	11.3663	-0.770534	0.00358109	0.0336325	12.1751	12.1828	12.0527	11.2624	11.6025	11.2341	Down
O43493	TGOLN2	Trans-Golgi network integral membrane protein 2 OS=Homo sapiens OX=9606 GN=TGOLN2 PE=1 SV=4	16.9347	17.3111	0.376363	0.00360916	0.0336554	16.8179	17.0238	16.9625	17.3064	17.3012	17.3257	Up
P68133	ACTA1	Actin, alpha skeletal muscle OS=Homo sapiens OX=9606 GN=ACTA1 PE=1 SV=1	11.9993	12.4799	0.480665	0.00365426	0.0339007	12.0786	11.9654	11.9539	12.6134	12.3906	12.4358	Up
P14921	ETS1	Protein C-ets-1 OS=Homo sapiens OX=9606 GN=ETS1 PE=1 SV=1	13.188	13.7572	0.569164	0.00365881	0.0339007	13.0362	13.2278	13.3002	13.8205	13.6583	13.7928	Up
Q8NHS3	MFSD8	Major facilitator superfamily domain-containing protein 8 OS=Homo sapiens OX=9606 GN=MFSD8 PE=1 SV=1	12.3275	12.6813	0.353875	0.00371624	0.0342206	12.3159	12.3452	12.3213	12.6241	12.7965	12.6234	Up
P21953	BCKDHB	2-oxoisovalerate dehydrogenase subunit beta, mitochondrial OS=Homo sapiens OX=9606 GN=BCKDHB PE=1 SV=2	14.6397	14.3365	-0.303172	0.00379024	0.0345189	14.7337	14.597	14.5884	14.369	14.3313	14.3094	Down
Q8N1I0	DOCK4	Dedicator of cytokinesis protein 4 OS=Homo sapiens OX=9606 GN=DOCK4 PE=1 SV=3	12.1988	13.1491	0.9503	0.00379942	0.0345604	12.1318	12.3176	12.1469	13.1921	12.8779	13.3773	Up
P01889	HLA-B	HLA class I histocompatibility antigen, B alpha chain OS=Homo sapiens OX=9606 GN=HLA-B PE=1 SV=3	11.2204	11.7179	0.497517	0.00382701	0.0346426	11.1894	11.3538	11.1181	11.6457	11.7099	11.7982	Up
Q9BRX8	PRXL2A	Peroxiredoxin-like 2A OS=Homo sapiens OX=9606 GN=PRXL2A PE=1 SV=3	15.3684	14.8894	-0.478943	0.00387149	0.0347744	15.5059	15.3474	15.2518	14.9187	14.9193	14.8303	Down
Q9Y6W6	DUSP10	Dual specificity protein phosphatase 10 OS=Homo sapiens OX=9606 GN=DUSP10 PE=1 SV=1	9.15812	10.3311	1.17296	0.00387193	0.0347744	8.89262	9.26678	9.31495	10.5841	10.0905	10.3186	Up
P32119	PRDX2	Peroxiredoxin-2 OS=Homo sapiens OX=9606 GN=PRDX2 PE=1 SV=5	17.0891	16.8247	-0.264368	0.00387727	0.0347744	17.1457	17.0941	17.0275	16.8802	16.7988	16.7952	Down
Q8NC74	RBBP8NL	RBBP8 N-terminal-like protein OS=Homo sapiens OX=9606 GN=RBBP8NL PE=1 SV=3	10.7729	10.3251	-0.447786	0.00388807	0.0347744	10.8406	10.7516	10.7266	10.3882	10.3943	10.1929	Down
P22676	CALB2	Calretinin OS=Homo sapiens OX=9606 GN=CALB2 PE=2 SV=2	18.2483	18.698	0.449653	0.00402844	0.0352852	18.3901	18.1601	18.1947	18.7349	18.7077	18.6513	Up
Q9H3H3	C11orf68	UPF0696 protein C11orf68 OS=Homo sapiens OX=9606 GN=C11orf68 PE=1 SV=3	14.5227	14.8756	0.352882	0.00403532	0.0352852	14.6147	14.5028	14.4506	14.8855	14.9297	14.8115	Up
Q9UM82	SPATA2	Spermatogenesis-associated protein 2 OS=Homo sapiens OX=9606 GN=SPATA2 PE=1 SV=2	13.0664	13.3906	0.324225	0.00407588	0.0353117	13.0149	13.1628	13.0215	13.391	13.3455	13.4354	Up
Q9NNW7	TXNRD2	Thioredoxin reductase 2, mitochondrial OS=Homo sapiens OX=9606 GN=TXNRD2 PE=1 SV=3	16.0597	15.7613	-0.298418	0.00416827	0.0357121	16.1549	16.0281	15.9961	15.7354	15.7868	15.7618	Down
Q9H7F4	TMEM185B	Transmembrane protein 185B OS=Homo sapiens OX=9606 GN=TMEM185B PE=1 SV=2	11.5443	12.2849	0.740657	0.00420226	0.0358247	11.3474	11.6686	11.6168	12.4023	12.1387	12.3138	Up
O43772	SLC25A20	Mitochondrial carnitine/acylcarnitine carrier protein OS=Homo sapiens OX=9606 GN=SLC25A20 PE=1 SV=1	12.339	11.9859	-0.353123	0.00424857	0.0360951	12.4211	12.3474	12.2486	12.035	12.0017	11.9211	Down
P42702	LIFR	Leukemia inhibitory factor receptor OS=Homo sapiens OX=9606 GN=LIFR PE=1 SV=1	10.3923	10.8858	0.493458	0.00428613	0.0361682	10.2687	10.5508	10.3576	10.9134	10.8791	10.8649	Up
Q9H939	PSTPIP2	Proline-serine-threonine phosphatase-interacting protein 2 OS=Homo sapiens OX=9606 GN=PSTPIP2 PE=1 SV=4	16.4333	16.1456	-0.287774	0.00430044	0.0362079	16.5118	16.3962	16.392	16.1746	16.1763	16.0858	Down
Q9ULJ6	ZMIZ1	Zinc finger MIZ domain-containing protein 1 OS=Homo sapiens OX=9606 GN=ZMIZ1 PE=1 SV=3	13.723	13.3373	-0.385687	0.00432086	0.0362079	13.8145	13.6845	13.6699	13.4318	13.2794	13.3007	Down
Q8N7C3	TRIML2	Probable E3 ubiquitin-protein ligase TRIML2 OS=Homo sapiens OX=9606 GN=TRIML2 PE=1 SV=2	10.5829	11.3809	0.797951	0.00432426	0.0362079	10.7515	10.5705	10.4267	11.2773	11.5801	11.2851	Up
Q5VW38	GPR107	Protein GPR107 OS=Homo sapiens OX=9606 GN=GPR107 PE=1 SV=1	14.081	14.4072	0.326166	0.00439507	0.0365506	14.1531	14.0506	14.0392	14.4371	14.3223	14.462	Up
Q96B23	C18orf25	Protein C18orf25 OS=Homo sapiens OX=9606 GN=C18orf25 PE=1 SV=3	12.6789	11.9396	-0.73932	0.00443105	0.0366351	12.7321	12.6457	12.659	12.0318	12.0946	11.6924	Down
Q9UI14	RABAC1	Prenylated Rab acceptor protein 1 OS=Homo sapiens OX=9606 GN=RABAC1 PE=1 SV=1	13.6208	13.9683	0.347522	0.00445943	0.0366683	13.5417	13.6157	13.7049	13.9752	14.0292	13.9004	Up
Q9C040	TRIM2	Tripartite motif-containing protein 2 OS=Homo sapiens OX=9606 GN=TRIM2 PE=1 SV=1	13.008	13.2962	0.288154	0.0044612	0.0366683	13.0873	12.9272	13.0096	13.3144	13.3156	13.2586	Up
Q8TDM6	DLG5	Disks large homolog 5 OS=Homo sapiens OX=9606 GN=DLG5 PE=1 SV=4	15.3134	15.6266	0.31324	0.00446779	0.0366683	15.2129	15.3744	15.3529	15.5989	15.6644	15.6166	Up
Q9Y5J9	TIMM8B	Mitochondrial import inner membrane translocase subunit Tim8 B OS=Homo sapiens OX=9606 GN=TIMM8B PE=1 SV=1	14.7563	15.114	0.357612	0.00450823	0.0368353	14.6439	14.8385	14.7866	15.1042	15.0823	15.1553	Up
Q8NFZ8	CADM4	Cell adhesion molecule 4 OS=Homo sapiens OX=9606 GN=CADM4 PE=1 SV=1	12.5382	12.2525	-0.285671	0.00462194	0.037325	12.6235	12.4614	12.5298	12.2697	12.2693	12.2187	Down
Q99715	COL12A1	Collagen alpha-1(XII) chain OS=Homo sapiens OX=9606 GN=COL12A1 PE=1 SV=2	14.6953	15.0247	0.329352	0.00492805	0.0384965	14.6136	14.7385	14.7339	14.9466	15.0372	15.0904	Up
Q9BZD2	SLC29A3	Equilibrative nucleoside transporter 3 OS=Homo sapiens OX=9606 GN=SLC29A3 PE=1 SV=3	12.5183	12.0929	-0.425332	0.0049501	0.0386109	12.4633	12.5971	12.4944	12.1653	12.1484	11.9651	Down
P02656	APOC3	Apolipoprotein C-III OS=Homo sapiens OX=9606 GN=APOC3 PE=1 SV=1	10.6314	11.781	1.14961	0.00495303	0.0386109	10.6338	10.7497	10.5105	11.9588	11.9885	11.3957	Up
P51636	CAV2	Caveolin-2 OS=Homo sapiens OX=9606 GN=CAV2 PE=1 SV=2	14.0637	14.3416	0.277908	0.00499282	0.0387307	14.1228	14.005	14.0633	14.4135	14.2986	14.3128	Up
Q6NSJ5	LRRC8E	Volume-regulated anion channel subunit LRRC8E OS=Homo sapiens OX=9606 GN=LRRC8E PE=1 SV=2	15.3875	15.6718	0.28431	0.00500691	0.0387307	15.3067	15.3784	15.4773	15.6581	15.6624	15.6948	Up
Q13363	CTBP1	C-terminal-binding protein 1 OS=Homo sapiens OX=9606 GN=CTBP1 PE=1 SV=2	13.6052	14.1543	0.549048	0.00502557	0.038737	13.7765	13.5276	13.5116	14.2485	14.122	14.0924	Up
P10243	MYBL1	Myb-related protein A OS=Homo sapiens OX=9606 GN=MYBL1 PE=1 SV=2	9.28318	10.1283	0.845108	0.00510844	0.039128	9.17134	9.56184	9.11636	10.2275	10.0255	10.1318	Up
Q9UGT4	SUSD2	Sushi domain-containing protein 2 OS=Homo sapiens OX=9606 GN=SUSD2 PE=1 SV=1	12.1478	11.6439	-0.503932	0.00512225	0.0391535	12.1594	12.2381	12.0459	11.6324	11.7729	11.5262	Down
O60936	NOL3	Nucleolar protein 3 OS=Homo sapiens OX=9606 GN=NOL3 PE=1 SV=2	13.0549	13.4372	0.382311	0.00514049	0.0392527	13.1508	12.9589	13.0549	13.3969	13.5189	13.3957	Up
P41134	ID1	DNA-binding protein inhibitor ID-1 OS=Homo sapiens OX=9606 GN=ID1 PE=1 SV=3	14.5017	14.0726	-0.429034	0.00517369	0.0394257	14.411	14.5148	14.5792	13.9536	14.1432	14.1211	Down
O60437	PPL	Periplakin OS=Homo sapiens OX=9606 GN=PPL PE=1 SV=4	19.5821	19.3123	-0.269824	0.00528315	0.0398934	19.6667	19.5608	19.5188	19.3193	19.3454	19.2722	Down
P08138	NGFR	Tumor necrosis factor receptor superfamily member 16 OS=Homo sapiens OX=9606 GN=NGFR PE=1 SV=1	11.4262	10.8583	-0.56783	0.00556045	0.041155	11.627	11.2912	11.3603	10.8732	10.8845	10.8173	Down
Q14563	SEMA3A	Semaphorin-3A OS=Homo sapiens OX=9606 GN=SEMA3A PE=1 SV=1	12.519	13.1175	0.598554	0.00574037	0.0421111	12.5695	12.5776	12.4098	13.1254	12.9461	13.281	Up
P21802	FGFR2	Fibroblast growth factor receptor 2 OS=Homo sapiens OX=9606 GN=FGFR2 PE=1 SV=1	14.1103	14.4031	0.292852	0.00576256	0.0422324	14.1748	14.0454	14.1107	14.4814	14.3743	14.3538	Up
Q9HA82	CERS4	Ceramide synthase 4 OS=Homo sapiens OX=9606 GN=CERS4 PE=1 SV=2	11.6664	11.0941	-0.57228	0.00577486	0.0422411	11.5645	11.7154	11.7191	11.2766	11.0374	10.9683	Down
O15194	CTDSPL	CTD small phosphatase-like protein OS=Homo sapiens OX=9606 GN=CTDSPL PE=1 SV=2	13.1263	13.4129	0.286685	0.00581847	0.0424339	13.1102	13.0633	13.2052	13.3717	13.479	13.3882	Up
O95562	SFT2D2	Vesicle transport protein SFT2B OS=Homo sapiens OX=9606 GN=SFT2D2 PE=1 SV=1	14.2256	14.5445	0.318944	0.00585038	0.0425259	14.138	14.2498	14.289	14.5755	14.4677	14.5904	Up
P11166	SLC2A1	Solute carrier family 2, facilitated glucose transporter member 1 OS=Homo sapiens OX=9606 GN=SLC2A1 PE=1 SV=2	15.6801	16.0431	0.363022	0.00592698	0.0428735	15.5577	15.7799	15.7026	16.0458	16.008	16.0754	Up
Q9HC44	GPBP1L1	Vasculin-like protein 1 OS=Homo sapiens OX=9606 GN=GPBP1L1 PE=1 SV=1	9.9126	10.3493	0.436729	0.0059743	0.0429966	9.85528	9.9584	9.92411	10.409	10.1981	10.4408	Up
Q9NNX1	TUFT1	Tuftelin OS=Homo sapiens OX=9606 GN=TUFT1 PE=1 SV=1	14.1302	13.8468	-0.283394	0.00605513	0.0433934	14.1512	14.1803	14.0591	13.9216	13.8283	13.7906	Down
Q5VWQ8	DAB2IP	Disabled homolog 2-interacting protein OS=Homo sapiens OX=9606 GN=DAB2IP PE=1 SV=2	15.2296	14.933	-0.296632	0.00605556	0.0433934	15.2219	15.2596	15.2072	15.0087	14.9609	14.8293	Down
Q7KYR7	BTN2A1	Butyrophilin subfamily 2 member A1 OS=Homo sapiens OX=9606 GN=BTN2A1 PE=1 SV=3	12.3137	12.6964	0.382719	0.0060571	0.0433934	12.3844	12.3623	12.1944	12.6884	12.7694	12.6314	Up
Q6EEV4	POLR2M	DNA-directed RNA polymerase II subunit GRINL1A, isoforms 4/5 OS=Homo sapiens OX=9606 GN=POLR2M PE=1 SV=1	13.9062	13.3784	-0.527857	0.00607066	0.043425	13.8362	13.8766	14.0059	13.5444	13.2609	13.3298	Down
Q9Y5T4	DNAJC15	DnaJ homolog subfamily C member 15 OS=Homo sapiens OX=9606 GN=DNAJC15 PE=1 SV=2	13.2129	13.5288	0.315928	0.00613492	0.0437047	13.1569	13.2669	13.2148	13.4977	13.6277	13.4609	Up
Q9UKA4	AKAP11	A-kinase anchor protein 11 OS=Homo sapiens OX=9606 GN=AKAP11 PE=1 SV=1	14.1259	14.4089	0.282952	0.0061374	0.0437047	14.0528	14.1753	14.1497	14.4567	14.333	14.4369	Up
Q8NAF0	ZNF579	Zinc finger protein 579 OS=Homo sapiens OX=9606 GN=ZNF579 PE=1 SV=2	11.9182	12.6719	0.753711	0.00616889	0.0437047	11.9402	12.0251	11.7893	12.5105	12.5874	12.9179	Up
Q9UGH3	SLC23A2	Solute carrier family 23 member 2 OS=Homo sapiens OX=9606 GN=SLC23A2 PE=1 SV=1	11.7293	12.1969	0.467622	0.00617092	0.0437047	11.568	11.8158	11.8041	12.2342	12.1241	12.2325	Up
Q15173	PPP2R5B	Serine/threonine-protein phosphatase 2A 56 kDa regulatory subunit beta isoform OS=Homo sapiens OX=9606 GN=PPP2R5B PE=1 SV=1	10.485	10.9379	0.4529	0.00617537	0.0437047	10.5254	10.5737	10.356	10.8328	11.0176	10.9634	Up
Q92851	CASP10	Caspase-10 OS=Homo sapiens OX=9606 GN=CASP10 PE=1 SV=3	13.2988	12.9448	-0.353935	0.00622184	0.0438346	13.3337	13.3874	13.1752	12.9448	12.9818	12.9078	Down
Q9NXG6	P4HTM	Transmembrane prolyl 4-hydroxylase OS=Homo sapiens OX=9606 GN=P4HTM PE=1 SV=2	12.841	12.3119	-0.52908	0.00625321	0.0439581	13.0058	12.8054	12.7118	12.3912	12.2167	12.3279	Down
Q9BWG4	SSBP4	Single-stranded DNA-binding protein 4 OS=Homo sapiens OX=9606 GN=SSBP4 PE=1 SV=1	13.5464	13.1713	-0.375103	0.00626291	0.0439581	13.4229	13.664	13.5522	13.1787	13.1936	13.1415	Down
Q969G5	CAVIN3	Caveolae-associated protein 3 OS=Homo sapiens OX=9606 GN=CAVIN3 PE=1 SV=3	9.96168	10.2286	0.266923	0.00629659	0.044029	10.0239	9.90351	9.95758	10.1849	10.1986	10.3022	Up
Q9Y255	PRELID1	PRELI domain-containing protein 1, mitochondrial OS=Homo sapiens OX=9606 GN=PRELID1 PE=1 SV=1	14.0315	14.6414	0.609902	0.00647102	0.0445621	13.7999	14.146	14.1485	14.6744	14.6338	14.6158	Up
P56556	NDUFA6	NADH dehydrogenase [ubiquinone] 1 alpha subcomplex subunit 6 OS=Homo sapiens OX=9606 GN=NDUFA6 PE=1 SV=4	13.6025	13.3369	-0.265638	0.00653275	0.0447173	13.6246	13.6426	13.5404	13.3282	13.4106	13.2719	Down
Q9NPH2	ISYNA1	Inositol-3-phosphate synthase 1 OS=Homo sapiens OX=9606 GN=ISYNA1 PE=1 SV=1	15.7747	15.5099	-0.264825	0.0067166	0.0456701	15.7277	15.8649	15.7316	15.5585	15.4793	15.4919	Down
O43854	EDIL3	EGF-like repeat and discoidin I-like domain-containing protein 3 OS=Homo sapiens OX=9606 GN=EDIL3 PE=1 SV=1	12.3962	12.7761	0.379979	0.0067906	0.0459808	12.386	12.3879	12.4146	12.9221	12.7155	12.6908	Up
Q8WVQ1	CANT1	Soluble calcium-activated nucleotidase 1 OS=Homo sapiens OX=9606 GN=CANT1 PE=1 SV=1	15.2039	15.5294	0.325496	0.00679122	0.0459808	15.0797	15.2804	15.2517	15.5155	15.5464	15.5264	Up
Q53FV1	ORMDL2	ORM1-like protein 2 OS=Homo sapiens OX=9606 GN=ORMDL2 PE=1 SV=2	13.6791	14.5684	0.889288	0.00682759	0.0461434	13.3358	13.8782	13.8234	14.5811	14.5899	14.5342	Up
Q7Z6K5	ARPIN	Arpin OS=Homo sapiens OX=9606 GN=ARPIN PE=1 SV=1	14.7816	14.4803	-0.301283	0.0073828	0.0483638	14.8942	14.7594	14.6913	14.4901	14.4671	14.4838	Down
P15941	MUC1	Mucin-1 OS=Homo sapiens OX=9606 GN=MUC1 PE=1 SV=3	12.2373	11.7824	-0.454879	0.00750668	0.0490034	12.3274	12.1777	12.2069	11.7868	11.9165	11.6441	Down
Q9UFF9	CNOT8	CCR4-NOT transcription complex subunit 8 OS=Homo sapiens OX=9606 GN=CNOT8 PE=1 SV=1	13.7017	13.4338	-0.267957	0.00751797	0.0490342	13.6434	13.7472	13.7146	13.4875	13.4673	13.3465	Down
Q9H0W8	SMG9	Nonsense-mediated mRNA decay factor SMG9 OS=Homo sapiens OX=9606 GN=SMG9 PE=1 SV=1	12.3866	12.654	0.267437	0.00759837	0.0493045	12.3851	12.3597	12.4149	12.7561	12.5945	12.6114	Up
Q86U70	LDB1	LIM domain-binding protein 1 OS=Homo sapiens OX=9606 GN=LDB1 PE=1 SV=2	12.5854	12.2836	-0.301831	0.00762998	0.0493045	12.5828	12.6736	12.4999	12.3519	12.248	12.2508	Down
Q9H8M1	COQ10B	Coenzyme Q-binding protein COQ10 homolog B, mitochondrial OS=Homo sapiens OX=9606 GN=COQ10B PE=2 SV=1	12.2481	12.868	0.619889	0.00765314	0.0493981	12.0863	12.1688	12.4892	12.91	12.8542	12.8399	Up
O75368	SH3BGRL	Adapter SH3BGRL OS=Homo sapiens OX=9606 GN=SH3BGRL PE=1 SV=1	15.972	15.7041	-0.267862	0.0076625	0.0494158	16.0581	15.9405	15.9174	15.7483	15.7216	15.6425	Down
Q8IWA4	MFN1	Mitofusin-1 OS=Homo sapiens OX=9606 GN=MFN1 PE=1 SV=3	15.6306	15.8949	0.2643	0.00782326	0.0500425	15.5307	15.7087	15.6522	15.9132	15.8939	15.8776	Up
Q96EM0	L3HYPDH	Trans-3-hydroxy-L-proline dehydratase OS=Homo sapiens OX=9606 GN=L3HYPDH PE=1 SV=2	12.1851	12.457	0.271884	0.00797559	0.0507278	12.2941	12.1233	12.138	12.4686	12.4397	12.4627	Up
O94855	SEC24D	Protein transport protein Sec24D OS=Homo sapiens OX=9606 GN=SEC24D PE=1 SV=2	15.001	15.2933	0.292257	0.00802437	0.0509142	14.9987	15.0865	14.9179	15.2309	15.2994	15.3496	Up
Q96PQ0	SORCS2	VPS10 domain-containing receptor SorCS2 OS=Homo sapiens OX=9606 GN=SORCS2 PE=1 SV=3	13.5389	13.0507	-0.488275	0.0080773	0.0511631	13.6643	13.5265	13.4261	13.1322	13.1126	12.9071	Down
O14896	IRF6	Interferon regulatory factor 6 OS=Homo sapiens OX=9606 GN=IRF6 PE=1 SV=1	15.8321	15.5588	-0.273295	0.00817878	0.0514435	15.9328	15.7448	15.8188	15.5788	15.5614	15.5364	Down
Q9NS00	C1GALT1	Glycoprotein-N-acetylgalactosamine 3-beta-galactosyltransferase 1 OS=Homo sapiens OX=9606 GN=C1GALT1 PE=1 SV=1	14.2671	14.5477	0.28054	0.00847697	0.0522758	14.161	14.3086	14.3319	14.5591	14.5799	14.504	Up
Q9H9H4	VPS37B	Vacuolar protein sorting-associated protein 37B OS=Homo sapiens OX=9606 GN=VPS37B PE=1 SV=1	13.3193	13.6322	0.312875	0.00854978	0.0524971	13.256	13.3883	13.3137	13.6744	13.5278	13.6943	Up
P55210	CASP7	Caspase-7 OS=Homo sapiens OX=9606 GN=CASP7 PE=1 SV=1	14.6397	14.3133	-0.326325	0.00885598	0.0535518	14.7048	14.6516	14.5626	14.2866	14.4181	14.2353	Down
Q14114	LRP8	Low-density lipoprotein receptor-related protein 8 OS=Homo sapiens OX=9606 GN=LRP8 PE=1 SV=4	12.3086	12.6187	0.310034	0.0089356	0.0537773	12.2167	12.4075	12.3017	12.5962	12.6868	12.573	Up
O15156	ZBTB7B	Zinc finger and BTB domain-containing protein 7B OS=Homo sapiens OX=9606 GN=ZBTB7B PE=1 SV=2	13.003	12.6991	-0.303942	0.00902141	0.0540706	13.0431	12.9165	13.0495	12.792	12.6375	12.6679	Down
P10586	PTPRF	Receptor-type tyrosine-protein phosphatase F OS=Homo sapiens OX=9606 GN=PTPRF PE=1 SV=2	16.366	16.6456	0.27956	0.00904871	0.0541472	16.4765	16.2763	16.3453	16.648	16.6542	16.6345	Up
Q8IVB5	LIX1L	LIX1-like protein OS=Homo sapiens OX=9606 GN=LIX1L PE=2 SV=1	11.4549	12.01	0.555075	0.00919011	0.0544914	11.2641	11.6246	11.4761	12.0778	11.9035	12.0486	Up
Q9NWZ8	GEMIN8	Gem-associated protein 8 OS=Homo sapiens OX=9606 GN=GEMIN8 PE=1 SV=1	13.4517	13.1279	-0.323778	0.00938563	0.0550749	13.3913	13.5053	13.4583	13.1548	13.2168	13.0121	Down
Q7L4E1	MIGA2	Mitoguardin 2 OS=Homo sapiens OX=9606 GN=MIGA2 PE=1 SV=1	12.6351	12.1588	-0.476298	0.00940056	0.0551047	12.784	12.6702	12.4511	12.1899	12.1028	12.1837	Down
Q15646	OASL	2'-5'-oligoadenylate synthase-like protein OS=Homo sapiens OX=9606 GN=OASL PE=1 SV=2	15.3343	15.9132	0.578854	0.0094301	0.0551912	15.5716	15.2002	15.2312	15.979	15.8918	15.8687	Up
Q96I45	TMEM141	Transmembrane protein 141 OS=Homo sapiens OX=9606 GN=TMEM141 PE=1 SV=1	12.0066	12.5753	0.568746	0.00944063	0.0552056	11.7656	12.1462	12.108	12.5961	12.5585	12.5714	Up
Q1W6H9	FAM110C	Protein FAM110C OS=Homo sapiens OX=9606 GN=FAM110C PE=1 SV=2	12.9684	13.2462	0.277845	0.00952444	0.0554824	13.0538	12.8858	12.9654	13.1774	13.283	13.2782	Up
Q9H3K2	GHITM	Growth hormone-inducible transmembrane protein OS=Homo sapiens OX=9606 GN=GHITM PE=1 SV=2	15.6142	15.3303	-0.283926	0.0095368	0.0555112	15.6092	15.6532	15.5803	15.4393	15.3049	15.2467	Down
Q16850	CYP51A1	Lanosterol 14-alpha demethylase OS=Homo sapiens OX=9606 GN=CYP51A1 PE=1 SV=4	16.3179	16.8862	0.56825	0.00957423	0.0555861	16.0859	16.4173	16.4505	16.9066	16.9359	16.816	Up
P19438	TNFRSF1A	Tumor necrosis factor receptor superfamily member 1A OS=Homo sapiens OX=9606 GN=TNFRSF1A PE=1 SV=1	10.2943	11.0846	0.790226	0.00967041	0.0558968	9.96201	10.4709	10.4501	11.0425	11.0564	11.1548	Up
Q9Y4K0	LOXL2	Lysyl oxidase homolog 2 OS=Homo sapiens OX=9606 GN=LOXL2 PE=1 SV=1	11.3964	11.8337	0.437274	0.00981289	0.0564424	11.2674	11.3939	11.5278	11.75	11.808	11.943	Up
P78504	JAG1	Protein jagged-1 OS=Homo sapiens OX=9606 GN=JAG1 PE=1 SV=3	13.7003	14.0632	0.362857	0.00985181	0.0565191	13.8269	13.6017	13.6724	14.0834	14.1231	13.9831	Up
O00194	RAB27B	Ras-related protein Rab-27B OS=Homo sapiens OX=9606 GN=RAB27B PE=1 SV=4	12.9799	13.3905	0.410616	0.00985376	0.0565191	13.0729	12.8544	13.0124	13.3916	13.4946	13.2854	Up
P78545	ELF3	ETS-related transcription factor Elf-3 OS=Homo sapiens OX=9606 GN=ELF3 PE=1 SV=1	15.117	14.8102	-0.306787	0.00987255	0.0565265	15.1034	15.1693	15.0784	14.7651	14.9302	14.7353	Down
Q9NQB0	TCF7L2	Transcription factor 7-like 2 OS=Homo sapiens OX=9606 GN=TCF7L2 PE=1 SV=2	13.1499	12.7516	-0.39832	0.00994227	0.056549	13.2238	13.1898	13.0361	12.8726	12.7285	12.6537	Down
P07996	THBS1	Thrombospondin-1 OS=Homo sapiens OX=9606 GN=THBS1 PE=1 SV=2	16.1619	16.8981	0.736255	0.00998679	0.0566728	15.8429	16.3252	16.3175	16.9117	16.8772	16.9054	Up
Q7Z7N9	TMEM179B	Transmembrane protein 179B OS=Homo sapiens OX=9606 GN=TMEM179B PE=1 SV=1	13.3152	13.5866	0.271426	0.0100001	0.0567049	13.3797	13.3577	13.2082	13.5419	13.6234	13.5946	Up
P05230	FGF1	Fibroblast growth factor 1 OS=Homo sapiens OX=9606 GN=FGF1 PE=1 SV=1	13.1141	12.7632	-0.350951	0.0100236	0.0567955	13.2397	13.0238	13.0788	12.8289	12.7706	12.69	Down
Q9H5J4	ELOVL6	Elongation of very long chain fatty acids protein 6 OS=Homo sapiens OX=9606 GN=ELOVL6 PE=1 SV=1	10.3233	11.0745	0.751176	0.010103	0.0569603	10.0872	10.3838	10.4988	10.9607	11.2911	10.9717	Up
Q16831	UPP1	Uridine phosphorylase 1 OS=Homo sapiens OX=9606 GN=UPP1 PE=1 SV=1	15.8354	16.2098	0.374434	0.0101371	0.056971	15.8298	15.7255	15.9508	16.1198	16.2896	16.22	Up
Q9H1C7	CYSTM1	Cysteine-rich and transmembrane domain-containing protein 1 OS=Homo sapiens OX=9606 GN=CYSTM1 PE=1 SV=1	13.174	13.4796	0.30559	0.010153	0.056971	13.2196	13.0851	13.2172	13.5758	13.453	13.4099	Up
P18440	NAT1	Arylamine N-acetyltransferase 1 OS=Homo sapiens OX=9606 GN=NAT1 PE=1 SV=2	14.4162	14.1526	-0.263613	0.0102004	0.056971	14.4983	14.4253	14.3251	14.1736	14.1874	14.0968	Down
Q8IVL1	NAV2	Neuron navigator 2 OS=Homo sapiens OX=9606 GN=NAV2 PE=1 SV=3	13.5504	13.2504	-0.300065	0.0102058	0.056971	13.6721	13.4491	13.5301	13.2398	13.2635	13.2478	Down
Q13011	ECH1	Delta(3,5)-Delta(2,4)-dienoyl-CoA isomerase, mitochondrial OS=Homo sapiens OX=9606 GN=ECH1 PE=1 SV=2	17.6842	17.3504	-0.333797	0.0102333	0.056971	17.8019	17.6378	17.6129	17.3793	17.4053	17.2666	Down
P12694	BCKDHA	2-oxoisovalerate dehydrogenase subunit alpha, mitochondrial OS=Homo sapiens OX=9606 GN=BCKDHA PE=1 SV=2	15.1368	14.7727	-0.364097	0.0102503	0.056971	15.2761	15.0672	15.0669	14.8094	14.8131	14.6956	Down
P02792	FTL	Ferritin light chain OS=Homo sapiens OX=9606 GN=FTL PE=1 SV=2	10.6888	11.582	0.893234	0.0102587	0.056971	10.4846	10.962	10.6197	11.8486	11.4211	11.4764	Up
O60443	GSDME	Gasdermin-E OS=Homo sapiens OX=9606 GN=GSDME PE=1 SV=2	15.7879	16.1163	0.328385	0.0102758	0.056971	15.9149	15.7503	15.6985	16.1719	16.1086	16.0683	Up
Q9UII4	HERC5	E3 ISG15--protein ligase HERC5 OS=Homo sapiens OX=9606 GN=HERC5 PE=1 SV=2	13.0699	13.3988	0.328957	0.0102951	0.0570336	13.2048	13.0089	12.9958	13.4219	13.3489	13.4256	Up
Q06323	PSME1	Proteasome activator complex subunit 1 OS=Homo sapiens OX=9606 GN=PSME1 PE=1 SV=1	16.9449	16.6455	-0.299442	0.0103474	0.0571136	17.0709	16.8807	16.8832	16.6737	16.6526	16.6102	Down
P08174	CD55	Complement decay-accelerating factor OS=Homo sapiens OX=9606 GN=CD55 PE=1 SV=4	14.1183	14.4508	0.332539	0.0105177	0.057921	14.246	14.0985	14.0104	14.4055	14.4936	14.4534	Up
Q99698	LYST	Lysosomal-trafficking regulator OS=Homo sapiens OX=9606 GN=LYST PE=1 SV=3	10.9733	11.6204	0.647082	0.0105247	0.057921	11.1951	10.967	10.7579	11.5578	11.753	11.5504	Up
P16403	H1-2	Histone H1.2 OS=Homo sapiens OX=9606 GN=H1-2 PE=1 SV=2	16.7932	16.4235	-0.369678	0.0106096	0.0582591	16.9352	16.7853	16.6589	16.3947	16.454	16.4217	Down
Q68CQ7	GLT8D1	Glycosyltransferase 8 domain-containing protein 1 OS=Homo sapiens OX=9606 GN=GLT8D1 PE=1 SV=2	13.5395	12.9941	-0.545483	0.0107255	0.0586371	13.3209	13.6716	13.6261	13.0875	12.9776	12.917	Down
Q9UPQ8	DOLK	Dolichol kinase OS=Homo sapiens OX=9606 GN=DOLK PE=1 SV=1	13.1305	13.4706	0.340133	0.0107458	0.0587047	13.1761	13.0807	13.1346	13.4601	13.3546	13.5971	Up
Q9NX61	TMEM161A	Transmembrane protein 161A OS=Homo sapiens OX=9606 GN=TMEM161A PE=1 SV=1	12.0598	12.3397	0.279847	0.0107878	0.0588482	12.0677	12.1262	11.9856	12.3989	12.3731	12.2471	Up
O43715	TRIAP1	TP53-regulated inhibitor of apoptosis 1 OS=Homo sapiens OX=9606 GN=TRIAP1 PE=1 SV=1	12.9167	13.1801	0.263439	0.0111147	0.0599311	12.9421	12.9029	12.905	13.069	13.2094	13.2619	Up
Q15058	KIF14	Kinesin-like protein KIF14 OS=Homo sapiens OX=9606 GN=KIF14 PE=1 SV=1	15.9727	16.2468	0.274076	0.0111445	0.0599618	15.8525	16.0334	16.0323	16.2371	16.2315	16.2718	Up
P00966	ASS1	Argininosuccinate synthase OS=Homo sapiens OX=9606 GN=ASS1 PE=1 SV=2	17.674	17.3678	-0.306141	0.0112366	0.060229	17.8054	17.6294	17.5871	17.3751	17.3916	17.3367	Down
Q9UK23	NAGPA	N-acetylglucosamine-1-phosphodiester alpha-N-acetylglucosaminidase OS=Homo sapiens OX=9606 GN=NAGPA PE=1 SV=2	12.9376	13.3253	0.387665	0.0113627	0.0605395	12.964	12.9593	12.8895	13.385	13.1595	13.4314	Up
P57768	SNX16	Sorting nexin-16 OS=Homo sapiens OX=9606 GN=SNX16 PE=1 SV=2	13.3369	13.6193	0.282449	0.011677	0.0611942	13.3476	13.3873	13.2757	13.5914	13.5407	13.7259	Up
Q30201	HFE	Hereditary hemochromatosis protein OS=Homo sapiens OX=9606 GN=HFE PE=1 SV=1	12.0486	11.6749	-0.373687	0.0117706	0.0613418	12.1561	11.9635	12.0261	11.6975	11.7717	11.5555	Down
Q86VU5	COMTD1	Catechol O-methyltransferase domain-containing protein 1 OS=Homo sapiens OX=9606 GN=COMTD1 PE=1 SV=1	11.2471	10.8528	-0.394348	0.0117927	0.0613711	11.3568	11.1781	11.2065	10.8643	10.9691	10.725	Down
P56377	AP1S2	AP-1 complex subunit sigma-2 OS=Homo sapiens OX=9606 GN=AP1S2 PE=1 SV=1	11.3307	11.6497	0.319001	0.0119316	0.0618356	11.3371	11.4106	11.2444	11.5627	11.6354	11.751	Up
Q9UBQ7	GRHPR	Glyoxylate reductase/hydroxypyruvate reductase OS=Homo sapiens OX=9606 GN=GRHPR PE=1 SV=1	15.8222	15.5545	-0.267688	0.0124092	0.0629894	15.9213	15.7781	15.767	15.5268	15.6276	15.509	Down
Q86X02	CDR2L	Cerebellar degeneration-related protein 2-like OS=Homo sapiens OX=9606 GN=CDR2L PE=1 SV=2	12.6374	12.3568	-0.280564	0.0124763	0.0630825	12.5429	12.6526	12.7166	12.4381	12.3166	12.3156	Down
P40261	NNMT	Nicotinamide N-methyltransferase OS=Homo sapiens OX=9606 GN=NNMT PE=1 SV=1	12.1446	11.4213	-0.723284	0.0125125	0.0631371	12.3793	12.015	12.0397	11.5913	11.4822	11.1906	Down
P29034	S100A2	Protein S100-A2 OS=Homo sapiens OX=9606 GN=S100A2 PE=1 SV=3	17.651	17.3438	-0.307136	0.0125202	0.0631371	17.6492	17.628	17.6758	17.2533	17.4813	17.2969	Down
P05187	ALPP	Alkaline phosphatase, placental type OS=Homo sapiens OX=9606 GN=ALPP PE=1 SV=2	15.7081	14.6671	-1.04098	0.0125361	0.0631711	15.4708	15.8914	15.7621	14.5038	14.4194	15.0782	Down
Q53EU6	GPAT3	Glycerol-3-phosphate acyltransferase 3 OS=Homo sapiens OX=9606 GN=GPAT3 PE=1 SV=2	12.8722	13.2306	0.358415	0.0127249	0.063745	12.7575	12.9433	12.9157	13.1838	13.1579	13.35	Up
Q96SL1	SLC49A4	Solute carrier family 49 member 4 OS=Homo sapiens OX=9606 GN=SLC49A4 PE=1 SV=1	13.2735	13.6378	0.364349	0.0127268	0.063745	13.1934	13.4152	13.2119	13.6621	13.7034	13.548	Up
Q8IZQ5	SELENOH	Selenoprotein H OS=Homo sapiens OX=9606 GN=SELENOH PE=1 SV=2	15.6908	15.3639	-0.326843	0.0127816	0.063848	15.7742	15.6526	15.6456	15.4706	15.3713	15.2499	Down
Q13882	PTK6	Protein-tyrosine kinase 6 OS=Homo sapiens OX=9606 GN=PTK6 PE=1 SV=1	10.0857	10.4166	0.330839	0.0131219	0.0648541	10.0476	9.99227	10.2173	10.4551	10.4546	10.34	Up
Q96FF7	MISP3	Uncharacterized protein MISP3 OS=Homo sapiens OX=9606 GN=MISP3 PE=2 SV=4	10.5076	9.786	-0.721616	0.0131417	0.0648659	10.4848	10.7496	10.2885	9.92921	9.58214	9.84664	Down
Q5JSP0	FGD3	FYVE, RhoGEF and PH domain-containing protein 3 OS=Homo sapiens OX=9606 GN=FGD3 PE=1 SV=1	15.28	14.7828	-0.497135	0.0132724	0.065325	15.4541	15.1566	15.2292	14.9075	14.7951	14.646	Down
Q86WA6	BPHL	Valacyclovir hydrolase OS=Homo sapiens OX=9606 GN=BPHL PE=1 SV=1	14.3531	14.0722	-0.280982	0.013646	0.0665634	14.4568	14.2905	14.3121	14.0743	14.1433	13.9988	Down
Q9GZM5	YIPF3	Protein YIPF3 OS=Homo sapiens OX=9606 GN=YIPF3 PE=1 SV=1	14.4312	14.7043	0.27308	0.013681	0.0666366	14.3152	14.5005	14.4778	14.6528	14.7082	14.7518	Up
O00220	TNFRSF10A	Tumor necrosis factor receptor superfamily member 10A OS=Homo sapiens OX=9606 GN=TNFRSF10A PE=1 SV=3	11.4588	11.7819	0.323127	0.0138364	0.0669669	11.5247	11.438	11.4138	11.7495	11.6812	11.9151	Up
Q5T6F2	UBAP2	Ubiquitin-associated protein 2 OS=Homo sapiens OX=9606 GN=UBAP2 PE=1 SV=1	14.9406	14.5253	-0.4153	0.0139017	0.0671959	14.8054	14.9901	15.0264	14.641	14.5418	14.3932	Down
Q9BUT1	BDH2	Dehydrogenase/reductase SDR family member 6 OS=Homo sapiens OX=9606 GN=BDH2 PE=1 SV=2	14.8553	14.4782	-0.377184	0.0141712	0.067708	15.022	14.7613	14.7828	14.4749	14.541	14.4186	Down
P53004	BLVRA	Biliverdin reductase A OS=Homo sapiens OX=9606 GN=BLVRA PE=1 SV=2	15.8841	15.6059	-0.278252	0.0141759	0.067708	15.9832	15.8371	15.832	15.5768	15.6941	15.5467	Down
Q99102	MUC4	Mucin-4 OS=Homo sapiens OX=9606 GN=MUC4 PE=1 SV=5	12.0218	12.29	0.268129	0.0143129	0.0679092	12.0555	12.0695	11.9405	12.3604	12.3165	12.193	Up
Q9H6X2	ANTXR1	Anthrax toxin receptor 1 OS=Homo sapiens OX=9606 GN=ANTXR1 PE=1 SV=2	12.4093	12.8025	0.393255	0.0148319	0.0695134	12.5534	12.3351	12.3393	12.8438	12.8854	12.6784	Up
Q9NZN9	AIPL1	Aryl-hydrocarbon-interacting protein-like 1 OS=Homo sapiens OX=9606 GN=AIPL1 PE=1 SV=2	12.7215	12.4437	-0.277757	0.0148363	0.0695134	12.7385	12.7154	12.7105	12.422	12.3398	12.5694	Down
P16402	H1-3	Histone H1.3 OS=Homo sapiens OX=9606 GN=H1-3 PE=1 SV=2	16.4823	16.1916	-0.290703	0.0150617	0.0703365	16.566	16.4612	16.4197	16.2822	16.2043	16.0883	Down
P57078	RIPK4	Receptor-interacting serine/threonine-protein kinase 4 OS=Homo sapiens OX=9606 GN=RIPK4 PE=1 SV=1	12.8545	12.5226	-0.331869	0.0152015	0.070628	12.946	12.7664	12.8509	12.5247	12.4127	12.6304	Down
Q9GZM8	NDEL1	Nuclear distribution protein nudE-like 1 OS=Homo sapiens OX=9606 GN=NDEL1 PE=1 SV=1	13.3457	13.6282	0.282528	0.0152643	0.070628	13.2919	13.4372	13.308	13.6798	13.6808	13.524	Up
Q14802	FXYD3	FXYD domain-containing ion transport regulator 3 OS=Homo sapiens OX=9606 GN=FXYD3 PE=1 SV=1	9.7788	10.1139	0.335115	0.0153409	0.0708975	9.79528	9.78924	9.75188	10.0494	10.2756	10.0167	Up
Q9UDR5	AASS	Alpha-aminoadipic semialdehyde synthase, mitochondrial OS=Homo sapiens OX=9606 GN=AASS PE=1 SV=1	14.117	13.8183	-0.29866	0.0154203	0.0710948	14.2538	14.0593	14.0379	13.8583	13.768	13.8287	Down
O60353	FZD6	Frizzled-6 OS=Homo sapiens OX=9606 GN=FZD6 PE=1 SV=2	14.7694	15.1989	0.429453	0.0156149	0.0718053	14.561	14.8579	14.8893	15.2346	15.1922	15.1698	Up
Q9HD67	MYO10	Unconventional myosin-X OS=Homo sapiens OX=9606 GN=MYO10 PE=1 SV=3	12.9951	13.4221	0.427008	0.0159883	0.0730757	12.7965	13.1082	13.0806	13.4207	13.3578	13.4878	Up
Q5VT79	ANXA8L1	Annexin A8-like protein 1 OS=Homo sapiens OX=9606 GN=ANXA8L1 PE=2 SV=2	12.2991	11.9415	-0.357645	0.0162735	0.073834	12.2993	12.3946	12.2033	12.0246	11.801	11.9988	Down
Q9NY35	CLDND1	Claudin domain-containing protein 1 OS=Homo sapiens OX=9606 GN=CLDND1 PE=1 SV=1	12.7381	13.0173	0.279193	0.0164729	0.0743242	12.748	12.7895	12.6767	13.1052	13.0491	12.8975	Up
P42892	ECE1	Endothelin-converting enzyme 1 OS=Homo sapiens OX=9606 GN=ECE1 PE=1 SV=2	14.7197	15.0119	0.292211	0.0164788	0.0743242	14.6303	14.7304	14.7984	14.9866	14.9318	15.1172	Up
Q7Z7L7	ZER1	Protein zer-1 homolog OS=Homo sapiens OX=9606 GN=ZER1 PE=1 SV=1	12.5659	12.2831	-0.282816	0.016563	0.0745582	12.4325	12.6464	12.6187	12.3223	12.2398	12.2871	Down
P19021	PAM	Peptidyl-glycine alpha-amidating monooxygenase OS=Homo sapiens OX=9606 GN=PAM PE=1 SV=2	11.965	12.3005	0.335482	0.0167316	0.0748661	11.8542	12.0071	12.0338	12.4102	12.1894	12.302	Up
P41440	SLC19A1	Reduced folate transporter OS=Homo sapiens OX=9606 GN=SLC19A1 PE=1 SV=3	14.0325	14.3464	0.313896	0.0172304	0.0759452	13.9196	14.0236	14.1544	14.353	14.4163	14.27	Up
P04156	PRNP	Major prion protein OS=Homo sapiens OX=9606 GN=PRNP PE=1 SV=1	14.1403	14.5306	0.390238	0.0172609	0.0759602	14.2992	13.9896	14.1321	14.4521	14.5363	14.6033	Up
A1L170	C1orf226	Uncharacterized protein C1orf226 OS=Homo sapiens OX=9606 GN=C1orf226 PE=1 SV=1	12.0504	12.3381	0.287705	0.0173331	0.0760984	12.0455	12.159	11.9465	12.3075	12.2886	12.4182	Up
Q9Y6K1	DNMT3A	DNA (cytosine-5)-methyltransferase 3A OS=Homo sapiens OX=9606 GN=DNMT3A PE=1 SV=4	10.2021	9.54985	-0.652246	0.0174909	0.0764167	10.1227	10.1461	10.3374	9.84228	9.32779	9.47948	Down
P28799	GRN	Progranulin OS=Homo sapiens OX=9606 GN=GRN PE=1 SV=2	11.6735	12.0523	0.378748	0.0174977	0.0764167	11.7661	11.6265	11.6281	12.0588	11.9014	12.1966	Up
Q495T6	MMEL1	Membrane metallo-endopeptidase-like 1 OS=Homo sapiens OX=9606 GN=MMEL1 PE=2 SV=2	12.7167	12.4427	-0.274092	0.0176539	0.0770088	12.6987	12.7549	12.6967	12.3847	12.3655	12.5778	Down
Q96H78	SLC25A44	Solute carrier family 25 member 44 OS=Homo sapiens OX=9606 GN=SLC25A44 PE=2 SV=1	12.2808	12.5679	0.287087	0.0178857	0.0774769	12.3374	12.2361	12.2688	12.6989	12.5322	12.4724	Up
P14209	CD99	CD99 antigen OS=Homo sapiens OX=9606 GN=CD99 PE=1 SV=1	14.1218	14.7601	0.638304	0.0180515	0.0779241	13.8537	14.1158	14.3958	14.8051	14.6553	14.8199	Up
Q9UDX5	MTFP1	Mitochondrial fission process protein 1 OS=Homo sapiens OX=9606 GN=MTFP1 PE=1 SV=1	13.6174	14.4797	0.862334	0.0188599	0.0802538	13.5563	13.7339	13.562	14.5967	14.7857	14.0568	Up
A2RU49	HYKK	Hydroxylysine kinase OS=Homo sapiens OX=9606 GN=HYKK PE=1 SV=2	10.9788	11.3617	0.382849	0.0189873	0.0806583	11.051	11.1005	10.785	11.3643	11.3211	11.3996	Up
Q6UX98	ZDHHC24	Probable palmitoyltransferase ZDHHC24 OS=Homo sapiens OX=9606 GN=ZDHHC24 PE=1 SV=1	11.4197	11.7845	0.364718	0.0190992	0.0809581	11.481	11.3751	11.4032	11.6578	11.96	11.7356	Up
Q8N490	PNKD	Probable hydrolase PNKD OS=Homo sapiens OX=9606 GN=PNKD PE=1 SV=2	14.262	14.535	0.272979	0.019244	0.0812865	14.1449	14.2686	14.3725	14.5473	14.5784	14.4794	Up
Q13835	PKP1	Plakophilin-1 OS=Homo sapiens OX=9606 GN=PKP1 PE=1 SV=2	14.1126	13.6467	-0.465926	0.0194693	0.0818216	13.8942	14.2009	14.2427	13.7422	13.5482	13.6496	Down
P17535	JUND	Transcription factor JunD OS=Homo sapiens OX=9606 GN=JUND PE=1 SV=3	11.69	12.0454	0.355329	0.0197509	0.0824944	11.5596	11.7664	11.744	11.9369	12.1708	12.0284	Up
Q99571	P2RX4	P2X purinoceptor 4 OS=Homo sapiens OX=9606 GN=P2RX4 PE=1 SV=2	10.103	10.5672	0.464206	0.020082	0.0832255	10.0957	10.0027	10.2106	10.3502	10.6747	10.6766	Up
P63165	SUMO1	Small ubiquitin-related modifier 1 OS=Homo sapiens OX=9606 GN=SUMO1 PE=1 SV=1	14.91	14.6306	-0.279474	0.0202348	0.0836733	14.9235	14.8826	14.924	14.683	14.7234	14.4853	Down
Q8WU20	FRS2	Fibroblast growth factor receptor substrate 2 OS=Homo sapiens OX=9606 GN=FRS2 PE=1 SV=4	10.7465	10.0051	-0.741365	0.0202708	0.083683	10.6969	10.7322	10.8104	9.64452	10.0531	10.3178	Down
P50151	GNG10	Guanine nucleotide-binding protein G(I)/G(S)/G(O) subunit gamma-10 OS=Homo sapiens OX=9606 GN=GNG10 PE=1 SV=1	13.8208	13.5366	-0.284238	0.0203405	0.0839243	13.8316	13.8144	13.8166	13.6887	13.4569	13.4642	Down
O75379	VAMP4	Vesicle-associated membrane protein 4 OS=Homo sapiens OX=9606 GN=VAMP4 PE=1 SV=2	11.1841	10.9047	-0.279344	0.0204202	0.0842064	11.2689	11.0622	11.2211	10.8216	10.9484	10.9442	Down
Q96J84	KIRREL1	Kin of IRRE-like protein 1 OS=Homo sapiens OX=9606 GN=KIRREL1 PE=1 SV=2	13.6658	14.0127	0.346815	0.020907	0.0856936	13.7902	13.5339	13.6734	14.126	13.9737	13.9383	Up
A4D1S5	RAB19	Ras-related protein Rab-19 OS=Homo sapiens OX=9606 GN=RAB19 PE=1 SV=2	11.4911	11.1825	-0.308649	0.021125	0.0861612	11.5557	11.4185	11.4993	11.256	11.0351	11.2564	Down
Q96QU6	ACCS	1-aminocyclopropane-1-carboxylate synthase-like protein 1 OS=Homo sapiens OX=9606 GN=ACCS PE=1 SV=1	11.4412	11.1131	-0.328057	0.0212946	0.0865223	11.4178	11.505	11.4007	11.2598	10.9717	11.1079	Down
Q16719	KYNU	Kynureninase OS=Homo sapiens OX=9606 GN=KYNU PE=1 SV=1	15.4184	15.7878	0.369428	0.0221367	0.0882631	15.5973	15.3455	15.3123	15.7042	15.7906	15.8686	Up
Q8WWZ3	EDARADD	Ectodysplasin-A receptor-associated adapter protein OS=Homo sapiens OX=9606 GN=EDARADD PE=1 SV=3	10.8406	10.4179	-0.422776	0.0221881	0.0883737	11.0416	10.7468	10.7336	10.518	10.3141	10.4215	Down
Q7Z419	RNF144B	E3 ubiquitin-protein ligase RNF144B OS=Homo sapiens OX=9606 GN=RNF144B PE=1 SV=1	10.7967	11.2474	0.450754	0.0222361	0.0884372	10.9843	10.7095	10.6963	11.3808	11.0996	11.262	Up
Q9HCE0	EPG5	Ectopic P granules protein 5 homolog OS=Homo sapiens OX=9606 GN=EPG5 PE=1 SV=2	12.6265	12.9959	0.369323	0.0225752	0.0892151	12.7991	12.5022	12.5783	12.9431	13.0967	12.9478	Up
P35612	ADD2	Beta-adducin OS=Homo sapiens OX=9606 GN=ADD2 PE=1 SV=3	10.8093	11.0847	0.275429	0.022711	0.0895963	10.7522	10.8955	10.78	11.0068	11.0387	11.2086	Up
O95671	ASMTL	Probable bifunctional dTTP/UTP pyrophosphatase/methyltransferase protein OS=Homo sapiens OX=9606 GN=ASMTL PE=1 SV=3	16.156	15.8509	-0.305114	0.0234404	0.0915548	16.3151	16.0715	16.0815	15.8607	15.8996	15.7924	Down
Q5T0D9	TPRG1L	Tumor protein p63-regulated gene 1-like protein OS=Homo sapiens OX=9606 GN=TPRG1L PE=1 SV=1	10.0052	10.7007	0.695503	0.0238192	0.0924467	10.0644	9.7644	10.1867	10.9166	10.411	10.7744	Up
P04350	TUBB4A	Tubulin beta-4A chain OS=Homo sapiens OX=9606 GN=TUBB4A PE=1 SV=2	13.0855	13.3546	0.269096	0.0240371	0.0928801	13.1056	13.1677	12.9832	13.3294	13.2774	13.4569	Up
P49716	CEBPD	CCAAT/enhancer-binding protein delta OS=Homo sapiens OX=9606 GN=CEBPD PE=1 SV=2	13.9005	13.5147	-0.385843	0.0242142	0.0932445	13.9232	13.8555	13.9228	13.6285	13.6146	13.3009	Down
Q9NVS2	MRPS18A	39S ribosomal protein S18a, mitochondrial OS=Homo sapiens OX=9606 GN=MRPS18A PE=1 SV=1	14.7842	14.4609	-0.323258	0.0247571	0.0943298	14.7316	14.6725	14.9484	14.4693	14.5227	14.3908	Down
Q02297	NRG1	Pro-neuregulin-1, membrane-bound isoform OS=Homo sapiens OX=9606 GN=NRG1 PE=1 SV=3	14.2763	14.5558	0.279519	0.0252031	0.0952513	14.1378	14.3436	14.3473	14.6358	14.5264	14.5052	Up
P24043	LAMA2	Laminin subunit alpha-2 OS=Homo sapiens OX=9606 GN=LAMA2 PE=1 SV=4	13.2976	12.8643	-0.433258	0.0257384	0.0964447	13.4621	13.2268	13.2039	13.0448	12.82	12.7282	Down
Q7Z6J6	FRMD5	FERM domain-containing protein 5 OS=Homo sapiens OX=9606 GN=FRMD5 PE=1 SV=1	12.4287	12.7416	0.31286	0.0262073	0.0974303	12.4765	12.3493	12.4604	12.5985	12.8811	12.7451	Up
Q12766	HMGXB3	HMG domain-containing protein 3 OS=Homo sapiens OX=9606 GN=HMGXB3 PE=2 SV=3	10.9904	11.3081	0.317754	0.0263008	0.0974819	11.0428	11.1076	10.8206	11.3509	11.3264	11.2471	Up
Q5U3C3	TMEM164	Transmembrane protein 164 OS=Homo sapiens OX=9606 GN=TMEM164 PE=2 SV=1	12.9233	12.5859	-0.337426	0.0263299	0.0975355	12.9371	12.8106	13.0222	12.7032	12.6123	12.4422	Down
Q7Z7F0	KHDC4	KH homology domain-containing protein 4 OS=Homo sapiens OX=9606 GN=KHDC4 PE=1 SV=1	11.8596	12.1423	0.282623	0.0264921	0.0978452	11.7233	11.8916	11.9641	12.1118	12.2237	12.0913	Up
Q6BDS2	BLTP3A	Bridge-like lipid transfer protein family member 3A OS=Homo sapiens OX=9606 GN=BLTP3A PE=1 SV=1	13.2115	12.903	-0.308535	0.026591	0.0981492	13.3366	13.1023	13.1956	13.0016	12.9094	12.798	Down
O14519	CDK2AP1	Cyclin-dependent kinase 2-associated protein 1 OS=Homo sapiens OX=9606 GN=CDK2AP1 PE=1 SV=1	13.3619	13.6929	0.331016	0.0266007	0.0981492	13.2006	13.3794	13.5057	13.6302	13.6851	13.7634	Up
O43474	KLF4	Krueppel-like factor 4 OS=Homo sapiens OX=9606 GN=KLF4 PE=1 SV=3	9.85709	10.6052	0.748145	0.0267473	0.0983984	10.284	9.64844	9.63881	10.6621	10.5112	10.6424	Up
Q96S90	LYSMD1	LysM and putative peptidoglycan-binding domain-containing protein 1 OS=Homo sapiens OX=9606 GN=LYSMD1 PE=1 SV=1	11.3772	10.98	-0.3972	0.0271418	0.099166	11.2349	11.4969	11.3997	11.1402	10.8365	10.9632	Down
P49917	LIG4	DNA ligase 4 OS=Homo sapiens OX=9606 GN=LIG4 PE=1 SV=2	12.5558	12.8344	0.278676	0.0272323	0.0993226	12.6335	12.4417	12.5921	12.8984	12.8853	12.7195	Up
Q9H0M0	WWP1	NEDD4-like E3 ubiquitin-protein ligase WWP1 OS=Homo sapiens OX=9606 GN=WWP1 PE=1 SV=1	11.7523	12.1071	0.354862	0.0273709	0.0996617	11.7564	11.8058	11.6946	12.1687	11.9126	12.24	Up
Q9NWH2	TMEM242	Transmembrane protein 242 OS=Homo sapiens OX=9606 GN=TMEM242 PE=1 SV=1	9.38262	10.0877	0.705083	0.0278425	0.100691	8.99168	9.67384	9.48233	10.044	10.0354	10.1837	Up
Q9UFN0	NIPSNAP3A	Protein NipSnap homolog 3A OS=Homo sapiens OX=9606 GN=NIPSNAP3A PE=1 SV=2	15.693	15.4245	-0.268551	0.0281082	0.101309	15.8342	15.6423	15.6027	15.3854	15.4951	15.3931	Down
P24592	IGFBP6	Insulin-like growth factor-binding protein 6 OS=Homo sapiens OX=9606 GN=IGFBP6 PE=1 SV=1	11.0627	11.4469	0.384151	0.0282979	0.101747	11.1789	11.0027	11.0066	11.4404	11.2797	11.6206	Up
Q86UW6	N4BP2	NEDD4-binding protein 2 OS=Homo sapiens OX=9606 GN=N4BP2 PE=1 SV=2	10.6461	11.0087	0.362598	0.0283483	0.101879	10.4577	10.6604	10.8201	11.0254	10.9582	11.0424	Up
Q9BVT8	TMUB1	Transmembrane and ubiquitin-like domain-containing protein 1 OS=Homo sapiens OX=9606 GN=TMUB1 PE=1 SV=1	12.7595	13.0532	0.293706	0.0283877	0.101968	12.7345	12.7801	12.7637	13.0782	13.1888	12.8924	Up
Q86XJ1	GAS2L3	GAS2-like protein 3 OS=Homo sapiens OX=9606 GN=GAS2L3 PE=1 SV=1	12.0571	12.4659	0.408732	0.0286275	0.102491	11.9025	12.1779	12.091	12.4627	12.3096	12.6252	Up
Q9NZC9	SMARCAL1	SWI/SNF-related matrix-associated actin-dependent regulator of chromatin subfamily A-like protein 1 OS=Homo sapiens OX=9606 GN=SMARCAL1 PE=1 SV=1	13.3057	13.5754	0.269694	0.0288206	0.102687	13.3412	13.3706	13.2052	13.4508	13.6261	13.6492	Up
Q9Y247	FAM50B	Protein FAM50B OS=Homo sapiens OX=9606 GN=FAM50B PE=1 SV=1	9.76403	9.20906	-0.554968	0.0288932	0.102811	9.87242	9.51866	9.901	9.42448	9.04874	9.15396	Down
Q08499	PDE4D	cAMP-specific 3',5'-cyclic phosphodiesterase 4D OS=Homo sapiens OX=9606 GN=PDE4D PE=1 SV=2	11.857	11.3427	-0.51432	0.0291646	0.103469	11.6703	11.8656	12.0352	11.4532	11.1167	11.4582	Down
P20671	H2AC7	Histone H2A type 1-D OS=Homo sapiens OX=9606 GN=H2AC7 PE=1 SV=2	15.9308	15.4301	-0.500716	0.0297281	0.104771	16.0758	15.9976	15.7191	15.4459	15.6051	15.2394	Down
Q8N465	D2HGDH	D-2-hydroxyglutarate dehydrogenase, mitochondrial OS=Homo sapiens OX=9606 GN=D2HGDH PE=1 SV=3	12.7439	12.397	-0.346934	0.030191	0.105955	12.9449	12.672	12.6148	12.4508	12.3771	12.363	Down
Q14145	KEAP1	Kelch-like ECH-associated protein 1 OS=Homo sapiens OX=9606 GN=KEAP1 PE=1 SV=2	13.1969	13.5142	0.317326	0.0302979	0.106089	13.0215	13.2669	13.3023	13.4522	13.5041	13.5864	Up
Q8NFG4	FLCN	Folliculin OS=Homo sapiens OX=9606 GN=FLCN PE=1 SV=1	12.9096	13.1839	0.274341	0.03035	0.106144	12.7474	13.0192	12.9621	13.2051	13.167	13.1796	Up
O15121	DEGS1	Sphingolipid delta(4)-desaturase DES1 OS=Homo sapiens OX=9606 GN=DEGS1 PE=1 SV=1	11.1271	11.4817	0.354633	0.0304378	0.106368	10.9431	11.2572	11.1809	11.5862	11.4315	11.4274	Up
O43930	PRKY	Putative serine/threonine-protein kinase PRKY OS=Homo sapiens OX=9606 GN=PRKY PE=5 SV=1	9.34865	9.0803	-0.26835	0.0304705	0.106433	9.3667	9.22333	9.45591	9.03155	9.17188	9.03745	Down
Q7Z6I8	C5orf24	UPF0461 protein C5orf24 OS=Homo sapiens OX=9606 GN=C5orf24 PE=1 SV=1	11.2713	10.9277	-0.343623	0.0306238	0.106917	11.1488	11.3405	11.3245	10.9475	11.0641	10.7714	Down
P62745	RHOB	Rho-related GTP-binding protein RhoB OS=Homo sapiens OX=9606 GN=RHOB PE=1 SV=1	12.054	12.4016	0.347574	0.0309274	0.107777	12.1099	12.1175	11.9346	12.2347	12.5339	12.4362	Up
O95081	AGFG2	Arf-GAP domain and FG repeat-containing protein 2 OS=Homo sapiens OX=9606 GN=AGFG2 PE=1 SV=2	12.8159	12.5119	-0.30407	0.0312552	0.108666	12.7014	12.7525	12.9939	12.5538	12.5126	12.4691	Down
A0A087WTH1	TMEM265	Transmembrane protein 265 OS=Homo sapiens OX=9606 GN=TMEM265 PE=3 SV=1	9.01794	9.48938	0.471448	0.031415	0.109019	9.11378	9.2031	8.73693	9.48677	9.44644	9.53494	Up
Q99551	MTERF1	Transcription termination factor 1, mitochondrial OS=Homo sapiens OX=9606 GN=MTERF1 PE=1 SV=1	12.986	12.7174	-0.268657	0.0316405	0.109394	12.8274	13.0653	13.0654	12.7657	12.6943	12.6922	Down
Q96AD5	PNPLA2	Patatin-like phospholipase domain-containing protein 2 OS=Homo sapiens OX=9606 GN=PNPLA2 PE=1 SV=1	15.0135	14.7018	-0.311723	0.0317126	0.109528	14.8626	15.0933	15.0846	14.8125	14.6851	14.6077	Down
Q9NR19	ACSS2	Acetyl-coenzyme A synthetase, cytoplasmic OS=Homo sapiens OX=9606 GN=ACSS2 PE=1 SV=1	15.6586	15.9778	0.319191	0.0317379	0.109528	15.8437	15.566	15.5661	16.0073	16.016	15.9101	Up
P55268	LAMB2	Laminin subunit beta-2 OS=Homo sapiens OX=9606 GN=LAMB2 PE=1 SV=2	14.9699	14.6814	-0.288464	0.0324095	0.111229	15.1373	14.9352	14.8372	14.6536	14.7069	14.6837	Down
P00813	ADA	Adenosine deaminase OS=Homo sapiens OX=9606 GN=ADA PE=1 SV=3	16.1728	15.9061	-0.266658	0.0325853	0.11173	16.3301	16.0867	16.1014	15.9564	15.894	15.8678	Down
Q01196	RUNX1	Runt-related transcription factor 1 OS=Homo sapiens OX=9606 GN=RUNX1 PE=1 SV=3	14.2044	14.4711	0.266728	0.0326351	0.111849	14.1012	14.217	14.2951	14.4746	14.3635	14.5753	Up
Q9H4I9	SMDT1	Essential MCU regulator, mitochondrial OS=Homo sapiens OX=9606 GN=SMDT1 PE=1 SV=1	9.63175	9.18934	-0.442417	0.0327714	0.11211	9.60149	9.87631	9.41746	9.2534	9.18553	9.12909	Down
O14925	TIMM23	Mitochondrial import inner membrane translocase subunit Tim23 OS=Homo sapiens OX=9606 GN=TIMM23 PE=1 SV=1	14.4568	14.8162	0.359401	0.0328756	0.11229	14.2488	14.5254	14.5962	14.8378	14.8668	14.7439	Up
Q86UF1	TSPAN33	Tetraspanin-33 OS=Homo sapiens OX=9606 GN=TSPAN33 PE=1 SV=1	9.92431	10.277	0.352718	0.032884	0.11229	9.80474	9.8721	10.0961	10.4095	10.2141	10.2075	Up
Q8N2G8	GHDC	GH3 domain-containing protein OS=Homo sapiens OX=9606 GN=GHDC PE=1 SV=2	11.4159	11.7909	0.375009	0.033791	0.114037	11.5001	11.3203	11.4274	11.591	11.8296	11.9523	Up
Q8IYH5	ZZZ3	ZZ-type zinc finger-containing protein 3 OS=Homo sapiens OX=9606 GN=ZZZ3 PE=1 SV=1	12.9047	12.6332	-0.271559	0.033977	0.114452	12.7947	12.9036	13.0159	12.6834	12.5189	12.6971	Down
Q9Y4L5	RNF115	E3 ubiquitin-protein ligase RNF115 OS=Homo sapiens OX=9606 GN=RNF115 PE=1 SV=2	12.0437	12.3837	0.340057	0.0345387	0.115562	11.9082	12.1226	12.1001	12.548	12.2723	12.3309	Up
P48029	SLC6A8	Sodium- and chloride-dependent creatine transporter 1 OS=Homo sapiens OX=9606 GN=SLC6A8 PE=1 SV=1	10.8579	11.1714	0.313523	0.0350629	0.116787	10.8245	10.7571	10.992	11.0617	11.1463	11.3062	Up
Q9Y2D9	ZNF652	Zinc finger protein 652 OS=Homo sapiens OX=9606 GN=ZNF652 PE=1 SV=3	10.8183	10.0633	-0.754996	0.0352077	0.116962	10.8839	10.684	10.8869	10.1079	10.4404	9.64145	Down
O14508	SOCS2	Suppressor of cytokine signaling 2 OS=Homo sapiens OX=9606 GN=SOCS2 PE=1 SV=1	9.34132	9.97722	0.635897	0.0355429	0.117814	9.514	8.97175	9.53822	9.97248	10.1281	9.83108	Up
P03891	MT-ND2	NADH-ubiquinone oxidoreductase chain 2 OS=Homo sapiens OX=9606 GN=MT-ND2 PE=1 SV=2	14.9002	14.5979	-0.302281	0.0358469	0.118244	15.0381	14.861	14.8015	14.6928	14.6306	14.4704	Down
Q8IUW5	RELL1	RELT-like protein 1 OS=Homo sapiens OX=9606 GN=RELL1 PE=1 SV=1	11.4888	11.8773	0.388476	0.0360393	0.118722	11.4261	11.579	11.4614	11.6596	12.0569	11.9154	Up
Q8NDX6	ZNF740	Zinc finger protein 740 OS=Homo sapiens OX=9606 GN=ZNF740 PE=1 SV=1	11.8245	11.524	-0.300534	0.037107	0.121011	11.8601	11.9106	11.703	11.5037	11.6631	11.4053	Down
Q02241	KIF23	Kinesin-like protein KIF23 OS=Homo sapiens OX=9606 GN=KIF23 PE=1 SV=3	16.8396	17.3005	0.460875	0.0375071	0.12163	16.5643	16.9853	16.9693	17.4212	17.2438	17.2364	Up
Q8IUZ5	PHYKPL	5-phosphohydroxy-L-lysine phospho-lyase OS=Homo sapiens OX=9606 GN=PHYKPL PE=1 SV=1	12.0237	12.5166	0.492864	0.0375574	0.12163	12.0743	12.2716	11.7253	12.4903	12.5554	12.5041	Up
Q9HBM1	SPC25	Kinetochore protein Spc25 OS=Homo sapiens OX=9606 GN=SPC25 PE=1 SV=1	14.1306	13.8364	-0.294275	0.0375908	0.121685	13.9556	14.226	14.2103	13.8095	13.9141	13.7855	Down
Q5VZI3	TMEM268	Transmembrane protein 268 OS=Homo sapiens OX=9606 GN=TMEM268 PE=2 SV=1	11.7044	12.0907	0.386297	0.0377731	0.121911	11.8391	11.7914	11.4827	12.2056	12.0568	12.0096	Up
Q9H8M5	CNNM2	Metal transporter CNNM2 OS=Homo sapiens OX=9606 GN=CNNM2 PE=1 SV=2	12.454	12.7701	0.316077	0.0382996	0.12302	12.4928	12.3995	12.4696	12.9553	12.7427	12.6121	Up
P29466	CASP1	Caspase-1 OS=Homo sapiens OX=9606 GN=CASP1 PE=1 SV=1	14.2925	13.8821	-0.410361	0.0385662	0.123352	14.5584	14.1278	14.1912	13.8678	13.8644	13.9143	Down
Q11206	ST3GAL4	CMP-N-acetylneuraminate-beta-galactosamide-alpha-2,3-sialyltransferase 4 OS=Homo sapiens OX=9606 GN=ST3GAL4 PE=1 SV=1	10.1084	10.4007	0.292303	0.0391644	0.124351	10.1608	10.1163	10.0481	10.2233	10.4537	10.5251	Up
Q9Y5X0	SNX10	Sorting nexin-10 OS=Homo sapiens OX=9606 GN=SNX10 PE=1 SV=2	11.9639	12.2836	0.31968	0.0394383	0.125011	11.7745	12.0669	12.0503	12.3732	12.2668	12.2107	Up
P50895	BCAM	Basal cell adhesion molecule OS=Homo sapiens OX=9606 GN=BCAM PE=1 SV=2	16.9382	16.4907	-0.44752	0.0404878	0.126732	17.2111	16.7032	16.9002	16.5057	16.5234	16.4429	Down
Q9Y241	HIGD1A	HIG1 domain family member 1A, mitochondrial OS=Homo sapiens OX=9606 GN=HIGD1A PE=1 SV=1	11.3626	11.9933	0.630726	0.04055	0.126732	10.9462	11.6324	11.5091	11.996	11.9808	12.003	Up
O94854	MACF1	Microtubule-actin cross-linking factor 1, isoforms 6/7 OS=Homo sapiens OX=9606 GN=MACF1 PE=2 SV=5	10.1354	10.4601	0.324727	0.0405786	0.126732	10.0876	10.2958	10.0229	10.3197	10.5504	10.5104	Up
O94985	CLSTN1	Calsyntenin-1 OS=Homo sapiens OX=9606 GN=CLSTN1 PE=1 SV=1	10.4982	10.8102	0.312001	0.0406433	0.126732	10.4456	10.694	10.355	10.8407	10.7586	10.8312	Up
Q9Y2A9	B3GNT3	N-acetyllactosaminide beta-1,3-N-acetylglucosaminyltransferase 3 OS=Homo sapiens OX=9606 GN=B3GNT3 PE=1 SV=2	12.4619	12.7565	0.29461	0.0409152	0.127261	12.2721	12.524	12.5896	12.7315	12.74	12.798	Up
Q6UWB1	IL27RA	Interleukin-27 receptor subunit alpha OS=Homo sapiens OX=9606 GN=IL27RA PE=1 SV=2	11.1896	11.5773	0.38776	0.0411176	0.127731	11.1898	11.2044	11.1745	11.3759	11.5349	11.8211	Up
Q0VAQ4	SMAGP	Small cell adhesion glycoprotein OS=Homo sapiens OX=9606 GN=SMAGP PE=1 SV=1	9.63867	10.0605	0.421832	0.0412921	0.128007	9.59216	9.8728	9.45104	10.0262	10.1947	9.96063	Up
Q8NDA8	MROH1	Maestro heat-like repeat-containing protein family member 1 OS=Homo sapiens OX=9606 GN=MROH1 PE=2 SV=3	12.2603	12.5767	0.31638	0.0424966	0.130495	12.3996	12.12	12.2613	12.675	12.4381	12.6171	Up
O15554	KCNN4	Intermediate conductance calcium-activated potassium channel protein 4 OS=Homo sapiens OX=9606 GN=KCNN4 PE=1 SV=1	11.5037	11.9282	0.42453	0.0426631	0.130926	11.7818	11.4163	11.3129	11.9789	11.9168	11.889	Up
Q8N3V7	SYNPO	Synaptopodin OS=Homo sapiens OX=9606 GN=SYNPO PE=1 SV=2	9.50769	8.71308	-0.794611	0.0430168	0.131714	9.82249	9.45437	9.24621	9.077	8.72315	8.33909	Down
P50452	SERPINB8	Serpin B8 OS=Homo sapiens OX=9606 GN=SERPINB8 PE=1 SV=2	13.5758	13.9305	0.354713	0.0439548	0.133872	13.6559	13.5808	13.4906	14.0967	13.7162	13.9785	Up
Q9GZM7	TINAGL1	Tubulointerstitial nephritis antigen-like OS=Homo sapiens OX=9606 GN=TINAGL1 PE=1 SV=1	9.418	9.69711	0.279107	0.0445417	0.134944	9.35748	9.47348	9.42305	9.81631	9.51947	9.75555	Up
Q8IXS6	PALM2	Paralemmin-2 OS=Homo sapiens OX=9606 GN=PALM2 PE=1 SV=3	11.3475	11.6266	0.279099	0.0445821	0.135012	11.2243	11.412	11.4063	11.7365	11.4849	11.6584	Up
A5YM69	ARHGEF35	Rho guanine nucleotide exchange factor 35 OS=Homo sapiens OX=9606 GN=ARHGEF35 PE=1 SV=1	11.4931	11.2178	-0.275326	0.0453414	0.136481	11.4942	11.4533	11.5319	11.2048	11.0634	11.3852	Down
Q96IQ9	ZNF414	Zinc finger protein 414 OS=Homo sapiens OX=9606 GN=ZNF414 PE=1 SV=2	10.0648	10.3864	0.3216	0.0462935	0.138288	10.1008	10.1366	9.95702	10.5756	10.3393	10.2442	Up
Q8TBM8	DNAJB14	DnaJ homolog subfamily B member 14 OS=Homo sapiens OX=9606 GN=DNAJB14 PE=1 SV=1	14.2562	14.5258	0.269607	0.0482956	0.141163	14.0862	14.3854	14.2968	14.5498	14.4541	14.5734	Up
O00481	BTN3A1	Butyrophilin subfamily 3 member A1 OS=Homo sapiens OX=9606 GN=BTN3A1 PE=1 SV=3	11.6165	11.3259	-0.290569	0.0493016	0.143207	11.7384	11.46	11.6511	11.3424	11.4274	11.2079	Down
